# Supplementary material for: Hypothesis-Based Analysis of Gene-Gene Interactions and Risk of Myocardial Infarction
Source: PubMed Central journal article supplement (PMC3410908; doi:10.1371/journal.pone.0041730), 2012-08-02
Supplement: pone.0041730.s001.pdf [file pone.0041730.s001.pdf]

## SUPPORTING INFORMATION

---

### Hypothesis-based analysis of gene-gene interactions in risk of myocardial infarction

Gavin Lucas MSc, PhD<sup>1</sup>; Carla Lluís-Ganella, MSc<sup>1</sup>; Isaac Subirana, MSc<sup>2,1</sup>; Muntaser D Musameh, MD, PhD<sup>5,6</sup>; Juan Ramon Gonzalez PhD<sup>3,2,4</sup>; Christopher P Nelson PhD<sup>7,8</sup>; Mariano Sentí, MD, PhD<sup>1,7</sup>; The Myocardial Infarction Genetics Consortium†; The Wellcome Trust Case Control Consortium†; Stephen M Schwartz PhD<sup>8</sup>; David Siscovick, MD, MPH<sup>8</sup>; Christopher J O'Donnell MD MPH<sup>9,10</sup>; Olle Melander MD, PhD<sup>11</sup>; Veikko Salomaa MD, PhD<sup>12</sup>; Shaun Purcell PhD<sup>13,14</sup>; David Altshuler, MD, PhD<sup>15,16,17</sup>; Nilesh J Samani, MD, FMedSci<sup>5,6</sup>; Sekar Kathiresan MD<sup>18,15,19</sup>; Roberto Elosua, MD, PhD<sup>1,2</sup>.

<sup>1</sup> Cardiovascular Epidemiology and Genetics, IMIM. Barcelona, Spain.

<sup>2</sup> Epidemiology and Public Health Network (CIBERESP), Barcelona, Spain.

<sup>3</sup> Center for Research in Environmental Epidemiology (CREAL), Barcelona, Spain.

<sup>4</sup> IMIM (Hospital del Mar Research Institute), Barcelona, Spain.

<sup>5</sup> Department of Cardiovascular Sciences, University of Leicester, Leicester, United Kingdom.

<sup>6</sup> Leicester NIHR Biomedical Research Unit in Cardiovascular Disease, Glenfield Hospital, Leicester United Kingdom.

<sup>7</sup> Pompeu Fabra University. Barcelona, Spain.

<sup>8</sup> Cardiovascular Health Research Unit, Departments of Medicine and Epidemiology, University of Washington, Seattle, Washington, USA.

<sup>9</sup> National, Heart, Lung, and Blood Institute and Framingham Heart Study, Framingham, Massachusetts, USA.

<sup>10</sup> Cardiology Division, Massachusetts General Hospital, Harvard Medical School, Boston, Massachusetts, USA.

<sup>11</sup> Department of Clinical Sciences, Hypertension and Cardiovascular Diseases, University Hospital Malmö, Lund University, Malmö, Sweden.

<sup>12</sup> Department of Chronic Disease Prevention, National Institute for Health and Welfare, Helsinki, Finland.

<sup>13</sup> Psychiatric and Neurodevelopmental Genetics Unit, Massachusetts General Hospital, Boston, Massachusetts, USA.

<sup>14</sup> Stanley Center for Psychiatric Research, Broad Institute, Cambridge, Massachusetts, USA.

<sup>15</sup> The Broad Institute of MIT and Harvard, Cambridge, Massachusetts, USA.

<sup>16</sup> Department of Genetics, Harvard Medical School, Boston, Massachusetts, USA.

<sup>17</sup> Department of Molecular Biology, Massachusetts General Hospital, Boston, Massachusetts, USA.

<sup>18</sup> Cardiovascular Research Center and Center for Human Genetic Research, Massachusetts General Hospital and Harvard Medical School, Boston, Massachusetts, USA.

<sup>19</sup> Department of Medicine, Harvard Medical School, Boston, USA.

† See Appendices for a full list of contributors

---

# CONTENTS

Page

Sections, tables and figures in the Supporting Information are indicated by the prefix S (Sx.x, S.Tx and S.Fx, respectively).

---

|                                                                                          |    |
|------------------------------------------------------------------------------------------|----|
| <b>Methods</b>                                                                           | 2  |
| 1. Source data from the MIGen discovery and WTCCC validation samples                     | 2  |
| 2. Selection of Risk Factor SNPs and Marginal SNPs                                       | 2  |
| 2.1. Source literature for SNP selection                                                 | 2  |
| 2.2. Definition of risk factor phenotype categories                                      | 3  |
| 2.3. Selection of risk factor SNPs                                                       | 3  |
| 2.4. Selection of marginal SNPs                                                          | 4  |
| 3. Statistical Analysis                                                                  | 4  |
| 3.1. Tests for association with MI for risk factor SNPs                                  | 4  |
| 3.2. Filtering SNP lists to remove redundancy via LD (pruning)                           | 4  |
| 3.3. Statistical tests for gene-gene interaction                                         | 4  |
| 3.4. Multiple testing                                                                    | 5  |
| 3.5. Quantile-Quantile plots                                                             | 6  |
| 3.6. Post-hoc power calculations                                                         | 6  |
| 3.7. Analysis of Lp(a) variants                                                          | 8  |
| 3.8. Validation and meta-analysis of top results                                         | 9  |
| <b>Results</b>                                                                           | 10 |
| 4. Risk factor SNP Selection                                                             | 10 |
| 5. Single locus test for association between risk factor SNPs and MI in the MIGen study. | 10 |
| 6. Pair-wise SNP-SNP interaction analysis                                                | 10 |
| 7. Adjustment for multiple testing                                                       | 10 |
| 8. Post-hoc power calculation                                                            | 11 |
| 9. Analysis of Lp(a) variants                                                            | 11 |
| <b>Tables</b>                                                                            | 12 |
| 1. Cardiovascular risk factor SNPs                                                       | 12 |
| 2. Results for top interactions in MIGen, validation in WTCCC, and meta-analysis.        | 17 |
| 3. Power Computation                                                                     | 21 |
| <b>Figures</b>                                                                           | 24 |
| 1. Source literature and process for selection of risk factor SNPs                       | 24 |
| 2. Graphical representation of interaction pairs tested in each Analysis.                | 25 |
| 3. Computation of significance threshold with adjustment for multiple testing            | 26 |
| 4. Power computation                                                                     | 28 |
| <b>Note 1 – Joint case-control/case-only interaction analysis</b>                        | 29 |
| <b>Note 2 – Logic Regression analysis</b>                                                | 32 |
| <b>Appendix 1 – MIGen investigators</b>                                                  | 36 |
| <b>Appendix 2 – WTCCC investigators</b>                                                  | 37 |
| <b>References</b>                                                                        | 38 |

---

## Methods

### 1. Source data from the MIGen discovery and WTCCC validation samples

*Discovery sample:* The Myocardial Infarction Genetics (MIGen) study is a collaborative study whose aim is to explore the genetic basis of myocardial infarction (MI). Our initial study consisted of 2,967 cases of early-onset myocardial infarction (in men  $\leq 50$  years old or women  $\leq 60$  years old) and 3,075 age- and sex-matched controls free of MI from six international sites in the US (Boston – Massachusetts General Hospital Premature Coronary Artery Disease Study; Seattle - Heart Attack Risk in Puget Sound), Sweden (Malmö Diet and Cancer Study), Finland (FINRISK), Spain (REGICOR) and Italy (ATVB) (see[1] for details). At each site, MI was diagnosed on the basis of autopsy evidence of fatal MI or a combination of chest pain, electrocardiographic evidence of MI, or elevation of one or more cardiac biomarkers (creatinine kinase or cardiac troponin). Mean age at the time of MI was 41 years among male cases and 47 years among female cases. All participants were of European ancestry. For these individuals, genotype data were obtained for  $\sim 2.55$  million single nucleotide polymorphisms, either through direct genotyping (Affymetrix 6.0 GeneChip) or by imputation (MACH 1.0 software[2]), using phased chromosomes from the HapMap CEU sample[1].

*Validation sample:* Validation of the top results in the discovery sample was performed in a sample of 1,766 cases of coronary artery disease (CAD) and 2,938 controls from the Wellcome Trust Case Control Consortium[3]. CAD cases presented a history of myocardial infarction or coronary revascularization (including coronary bypass surgery or coronary angioplasty) before the age of 60 (see table).

| MI Status | N    | Additional Cardiovascular Phenotype |     |      | Age        | Proportion of females |
|-----------|------|-------------------------------------|-----|------|------------|-----------------------|
|           |      | Angina                              | PCI | CABG | mean (SD)  | %                     |
| MI        | 1280 | 908                                 | 279 | 561  | 47,9 (7,1) | 19,3                  |
| No MI     | 486  | 471                                 | 176 | 366  | 50,5 (6,2) | 22,2                  |

*PCI, percutaneous coronary intervention; CABG, coronary artery bypass grafting*

The control subjects were selected from 2 different studies: a) a British cohort of people born in 1958 (1958 Birth Cohort Controls, 58C); and b) blood donors (UK Blood Services Controls, NBS). Mean age of cases and controls was 48.6 years and 43.7 years, respectively.

Extended details of the methods implemented in these studies are provided in the original manuscripts.

### 2. Selection of Risk Factor SNPs and Marginal SNPs

#### 2.1. Source literature for SNP selection

To perform interaction analyses for SNPs associated with cardiovascular risk factors, we obtained data from published GWA studies that studied these traits. We identified SNPs of interest by, i) filtering the NHGRI catalogue of GWA studies[4], and ii) mining data from a series of recently published large meta-analyses of GWA studies of cardiovascular risk factors (S.F1).

From the NHGRI catalogue (accessed June 30th, 2010), we filtered the list of reported phenotypes to identify those we considered relevant to cardiovascular disease (S.F1, second column), and identified 48 GWA studies of interest. For subsequent analyses, the accuracy of the all reported associations (p-values, direction of effect, effect allele, etc.) for all SNPs in all relevant articles was verified in the original report, and in cases of discrepancy the data from the original report was used. We also identified eight large meta-analyses of GWA studies of phenotypes of interest that were published after June 30<sup>th</sup>, 2010 (S.F1, third column). Data for SNPs selected in this process are shown in S.T1.

## 2.2. Definition of risk factor phenotype categories

We grouped the phenotypes reported in these studies into 11 categories broadly definable as distinct cardiovascular risk factors or cardiovascular endpoints. These were LDL cholesterol (*LDL*), HDL cholesterol (*HDL*), Triglycerides (*TG*), Smoking (*SMK*), Blood Pressure (*BP*), Carbohydrate Metabolism (including Type 2 Diabetes (*T2D*), see below) (*CH*), Obesity/Body Mass (*OB*), Plasma LP(a) levels (*LP(a)*), Concentration of Small LDL Particles (*smallLDL*), and Coronary Artery Disease (*CAD*).

We defined the category *CH* because, in addition to variants associated with overt T2D, we wanted to be able to capture variants that may contribute to cardiovascular risk through association with T2D-related traits, but that may or may not have also been declared as being associated with T2D as a clinical endpoint. Thus, this category contains variants associated with insulin and plasma glucose traits as well as variants associated with overt T2D[5,6]. We used data from a recent GWAS of NMR-based measurements related to lipid quality[7] to test for interaction between variants associated with relative concentrations of small LDL particles and those associated with other CVRFs. The BP category was composed of SNPs associated with either systolic or diastolic blood pressure because in the original reports, most of these SNPs were not observed to have markedly dissimilar effects on these phenotypes.

## 2.3. Selection of risk factor SNPs

From the studies mentioned above we selected SNPs with a reported p-value of  $\leq 5 \times 10^{-8}$  for association with the phenotype of interest, irrespective of their level of association with other phenotypes in the

case of overlap/pleiotropy. This literature search resulted in a list of 364 SNPs, of which 242 remained after LD pruning (see S3.2). Details of the SNPs included in the pair-wise interaction analysis are given in S.T1. These SNPs were included in the analyses performed in Analyses 1 and 2.

#### 2.4. *Selection of marginal SNPs*

For Analyses 2 and 3, we used a threshold approach to select SNPs between which interaction testing was to be performed. We selected SNPs that achieved an arbitrary p-value of  $\leq 10^{-3}$  (Analysis 2 and 3a) or  $\leq 10^{-2}$  (Analysis 3b) for association with MI in the discovery phase of the MIGen study. These lists of SNPs were pruned to remove redundancy through LD (S3.2).

### 3. Statistical Analysis

All statistical analyses were carried out using packaged or custom functions written in R v2.11 (R Foundation for Statistical Computing, Vienna[8]; packages and functions indicated below by `<package>::<function>`), or using PLINK v1.07[9] where indicated.

#### 3.1. *Tests for association with MI for risk factor SNPs*

The selection of marginal SNPs was based on the results of the test for single locus association with early-onset MI (age- and sex-matched, with adjustment for ancestry principal components, analyzed using PLINK), as reported previously[1]. See S.T1 for single locus association results for risk factor SNPs.

#### 3.2. *Filtering SNP lists to remove redundancy via LD (pruning)*

To remove redundancy between SNPs, we applied an LD-based pruning technique implemented in the `--indep-pairwise` function in PLINK. This procedure allowed us to ensure that interaction testing was performed only between mutually independent SNPs, with pair-wise  $r^2 < 0.5$ . We also avoided redundancy between Analyses by eliminating from Analyses 2, 3a and 3b any SNPs that had been included in a previous Analysis or that were in LD ( $r^2 \geq 0.5$ ) with any SNPs from a previous Analysis. LD calculations were also performed using PLINK (S.F2).

#### 3.3. *Statistical tests for gene-gene interaction*

*Test A – Model-free case-control test:* SNPs were coded as factors with three levels corresponding to their three genotypes. Thus, this test can be thought of as the two-locus equivalent of a single locus



distribution were estimated using 10,000 permutations in Analysis 1. We observed that estimations of these parameters, and consequently of the significance thresholds, were stable after ~200-300 permutations (see Figure 2 in the main manuscript). Therefore, the estimations of these parameters in Analyses 2, 3a and 3b were based on just 1,000, 1,000 and 200 permutations, respectively (See S.F3).

We set the p-value threshold for declaring statistical significance in the validation of top results in the WTCCC as 0.05 with a standard Bonferroni correction for the number of pairs for which we attempted validation in each Analyses (thresholds shown in the results section of the main manuscript).

For the meta-analysis, we set the p-value threshold for declaring statistical significance to be equal to the thresholds used in the discovery analysis of each Analysis (S7).

### 3.5. *Quantile-Quantile plots*

To construct a quantile-quantile (QQ) plot in a GWAS setting, the observed test statistics (e.g.  $\chi^2$  values) are plotted against their expected distribution under H0. Since the majority of SNPs will not show any true association with the phenotype under study (in the absence of population stratification), their test statistics will be mutually independent and will follow a parametric distribution (e.g. the  $\chi^2$  distribution). However, because of the potential non-independence between pair-wise gene-gene interaction tests, their results may not follow a parametric distribution under H0. To estimate this expected distribution, we used a permutation-based approach similar to that used to compute the threshold for statistical significance in each stage of the interaction analysis (see S3.4).

We performed 1,000 permutations of the analyses under H0 (randomized MI status), and obtained the rank order of all tests within each permutation. Then, for each rank we took the median across all permutations as the expected value for that rank under H0, and plotted this median against the observed value for that rank. The 95% confidence interval of the estimation of the expected distribution was computed by taking the 2.5<sup>th</sup> and 97.5<sup>th</sup> percentiles all permutations within each rank. QQ plots for Analysis 1 are provided in Figure 2 in the main manuscript, and for Analyses 2, 3a and 3b in S.F3.

### 3.6. *Post-hoc power calculations*

We considered that the power of our analysis to detect interactions was a function of sample size (fixed for this study), an acceptable Type I error rate ( $\alpha$ , derived from the beta-distribution), the interaction effect size, the interaction model (e.g. dominant-recessive, etc.), and the frequency of the

compound genotype(s) that carry additional risk. Since the latter three parameters are expected to vary for every pair of SNPs, it is not possible to compute a single value to describe the study's power.

Thus, we have dealt with these unknown parameters as follows:

*Interaction effect size:* Since the true interaction effect size we may expect to find is unknown and will change for every SNP pair, we have expressed the power of the study in terms of the effect size that could be detected with 80% power ( $\beta^{0.8}$ ).

*Interaction model:* Since the true interaction model is unknown, we computed power to detect interactions under 3 different interaction models: a model with recessive  $\times$  recessive effects, which is intrinsically the least powerful model because the non-reference group is small; a model with dominant  $\times$  dominant effects, which is one of the most powerful models because the non-reference group is large, while being very simple because it is driven by the presence of the interacting alleles for each SNP; and a model with additive  $\times$  additive effects, which is arguably the most biologically plausible for complex diseases. The recessive  $\times$  recessive and dominant  $\times$  dominant interaction models mentioned in this paper correspond to those referred by Li and Reich[10] as models M1 (RR), which requires two copies of the interacting allele from both loci to modify disease risk, and M27 (DD), which requires at least one copy of the interacting allele from both loci to modify disease risk. In classical genetics these models are also called 'recessive complementary' and 'dominant complementary' epistasis or 'duplicate dominant' and 'duplicate recessive' epistasis, respectively. The additive  $\times$  additive model corresponds to that referred to as Model 2 by Marchini *et al.*[11], in which the  $\ln(\text{odds})$  for disease risk has a baseline value unless both loci have at least one disease-associated allele, after which  $\ln(\text{odds})$  increases additively within and between genotypes.

*Frequency of the risk compound genotype(s):* Within the range of MAFs from 0.02 to 0.5, we defined MAF bins of 0.02 (i.e.  $0.02 \geq \text{MAF} > 0.04$ ,  $0.04 \geq \text{MAF} > 0.06$ , etc.; 24 bins for each SNP, giving  $24^2=576$  bin combinations). For each bin combination, we computed (see below) the mean  $\beta^{0.8}$  (effect size detectable with high power) of 10 randomly selected pairs of SNPs whose MAFs fell within these bins.

*Power Computation:* For each pair of SNPs selected, we computed  $\beta^{0.8}$  as follows:

- A model free logistic regression model including a term for interaction SNPs was fit, from which the block of the estimated variance-covariance matrix,  $V$ , corresponding to the 4 interaction effects was obtained.
- The 4-component vector corresponding to the values of the 4 interaction terms under the alternative hypothesis,  $\vec{\beta}$ , was defined under the 3 interaction models as follows:



a. recessive × recessive:  $\tilde{\beta} = (0,0,0,\beta^{0.8})^t$

b. dominant × dominant:  $\tilde{\beta} = (\beta^{0.8}, \beta^{0.8}, \beta^{0.8}, \beta^{0.8})^t$

c. additive × additive:  $\tilde{\beta} = (\beta^{0.8}, 2\beta^{0.8}, 2\beta^{0.8}, 4\beta^{0.8})^t$

- Finally,  $\beta^{0.8}$  was obtained by solving the following equation

$$0.8 = P(\chi_4^2(\gamma) > c),$$

where  $c$  is the 95<sup>th</sup> percentile of  $\chi_4^2$ ,  $\chi_4^2(\gamma)$  is a chi-squared variable with 4 degrees of freedom and non-centrality parameter  $\gamma = \tilde{\beta}'V^{-1}\tilde{\beta}$ .

In Analyses 1, 2 and 3a, data on variance,  $V$ , for each of a series of SNP pairs, was obtained from the actual interaction tests performed in that Analysis. For Analysis 3b, we assumed that variances would be similar to those computed for Analysis 3a, so we computed power from these variances, but using the Type I error rate ( $\alpha$ ) computed for Analysis 3b.

The results of these power calculations are shown in S.T3 and S.F4.

### 3.7. Analysis of Lp(a) variants

Recent studies have highlighted the potential relevance of lipoprotein(a) (Lp(a), encoded by the *LPA* gene) as a cardiovascular risk factor (see[12]). Clarke *et al.*[13] observed that two SNPs in *LPA*, rs3798220 and rs10455872, were strongly associated with risk of CAD, and noted that rs3798220 was in strong LD ( $r^2=0.86$ ) with a four-SNP haplotype previously reported by Trégouët *et al.*[14] as also being associated with CAD.

While neither of these SNPs was available in the MIGen genotype data, the four SNPs (rs2048327, rs3127599, rs7767084 and rs10755578) that comprised the Trégouët haplotypes were available. To attempt to capture the CAD risk-associated variation in *LPA* we re-constructed the Trégouët haplotypes in the MIGen sample (S.9), verified the association between these haplotypes and risk of MI, and then tested for interaction between these haplotypes and the CVRF SNPs.

We tested for direct association between MI and these haplotypes using the *haplo.stats::haplo.glm* function[15] to fit a logistic regression model of MI risk on haplotype effects, while accounting for ambiguity in the assignment of haplotypes; this model was adjusted for age, sex and IBS principal components.

To test for evidence of interaction between these haplotypes and the 242 CVRF SNPs as a predictor of MI risk, we used a likelihood ratio test to compare the fit of a regression model (fit using

*haplo.stats::haplo.glm*) containing an haplotype-SNP interaction term to an equivalent model lacking this term, again with adjustment for age, sex and IBS principal components. We used a Bonferroni correction to set the threshold for declaring statistical significance. The results of the test for association between these haplotypes and MI risk, and those for interaction between the haplotypes and CVRF SNPs are shown in S.9.

### 3.8. Validation and meta-analysis of top results

*Validation.* We selected all SNP pairs with p-values for interaction in the MIGen discovery sample within 3 orders of magnitude of the significance threshold within each Analysis:  $p \leq 1.51 \times 10^{-3}$ ,  $p \leq 3.13 \times 10^{-4}$ ,  $p \leq 2.93 \times 10^{-4}$  and  $p \leq 3.57 \times 10^{-6}$  for Analyses 1, 2 and 3a and 3b, respectively. Using the same interaction testing procedure (reproduced faithfully in the discovery and validation samples using a standardized R-script to perform data formatting, quality control and interaction testing), we validated these top results in a sample of CAD cases and controls from the WTCCC (S1). [Note that the top results in Analyses 3a and 3b, which were initially computed using Test B in the MIGen sample, were reproduced using Test A in the MIGen sample for the purpose of including them in the meta-analysis.]

*Meta-analysis.* We performed a fixed effects meta-analysis by pooling the  $\beta$ -coefficients of the interaction terms from the models for each study, weighted by the inverse of their variances, as follows:

For each interaction term ( $j=1, 2, 3, 4$ ), the pooled  $\beta$ -coefficient of the interaction term was computed

as  $\hat{\beta}_{pooled}(j) = \frac{\hat{\beta}_1(j) \cdot w_1(j) + \hat{\beta}_2(j) \cdot w_2(j)}{w_1(j) + w_2(j)}$ , where  $\hat{\beta}_1$  and  $\hat{\beta}_2$  were the  $\beta$ -coefficients and  $w_1$  and  $w_2$

the weights of the interaction terms for the MIGen and WTCCC samples, respectively. The variance-

covariance matrix of the  $\hat{\beta}_{pooled}$  vector was computed as  $V_{pooled} = [V_1^{-1} + V_2^{-1}]^{-1}$ , where,  $V_1$  and  $V_2$  are

the variance-covariance matrices of beta-coefficients of the interaction terms for the MIGen and WTCCC samples, respectively. The vector weights,  $w_1$  and  $w_2$  were computed as  $w_1(j) = 1/V_1(j, j)$  and

$w_2(j) = 1/V_2(j, j)$ , where  $M(j, j)$  is the  $j$ -th element of the diagonal of the matrix  $M$ . The test for

interaction consisted of testing whether or not all interaction terms are equal to zero [H0:

$\beta_{pooled} = (0,0,0,0)^t$ ; H1:  $\beta_{pooled} \neq (0,0,0,0)^t$ ] by computing the following statistic, which corresponds to a

Wald test:  $\chi^2 = \hat{\beta}_{pooled}^t V_{pooled}^{-1} \hat{\beta}_{pooled}$ . This test statistic follows a  $\chi^2$  distribution with 4 degrees of freedom

under the null hypothesis.

## Results

### 4. Risk factor SNP Selection

We selected 242 independent SNPs for interaction analysis on the basis of their association with CV risk factors or clinical endpoints. dbSNP rs# identifiers, reported phenotype, local gene(s), p-value for association with MI in the MIGen study, minor allele frequency in MIGen controls, and references of studies that discovered or verified the association are shown in S.T1. The literature sources and process used to select these SNPs are described in S.F1.

### 5. Single locus test for association between risk factor SNPs and MI in the MIGen study.

A full list of the results of the single locus test for association between the CVRF SNPs and MI is given in S.T1.

### 6. Pair-wise SNP-SNP interaction analysis

Results for SNP pairs that showed a p-value for interaction within 3 orders of magnitude of the threshold for statistical significance in Analyses 1, 2, 3a and 3b are shown in S.T2. These SNP pairs were brought forward for validation in the WTCCC sample; results for interaction in WTCCC and for meta-analysis of both studies are also shown in S.T2.

### 7. Adjustment for multiple testing

Figure 2 in the main manuscript and S.F3 show the distribution of the minimum p-values for a large number of permutations under the null hypothesis, as well as the corresponding beta distribution from which the threshold for declaring statistical significance was computed in each Analysis. The following table compares Bonferroni corrected significance levels ( $\alpha=0.05/\text{number of tests}$ ) in each Analysis to the empirically derived thresholds:

|                    | Empirical Threshold   | Bonferroni Threshold  | Number of tests |
|--------------------|-----------------------|-----------------------|-----------------|
| <b>Analysis 1</b>  | $1.51 \times 10^{-6}$ | $1.71 \times 10^{-6}$ | 29,161          |
| <b>Analysis 2</b>  | $3.13 \times 10^{-7}$ | $3.21 \times 10^{-7}$ | 155,606         |
| <b>Analysis 3a</b> | $2.93 \times 10^{-7}$ | $2.42 \times 10^{-7}$ | 201,537         |
| <b>Analysis 3b</b> | $3.57 \times 10^{-9}$ | $2.75 \times 10^{-9}$ | 17,470,706      |

## 8. Post-hoc power calculation

For a range of MAFs and interaction models, we computed the interaction effect size that our study could detect with 80% power (S.T3, S.F4). These calculations give a two dimensional array of effect sizes (one dimension for each SNP) for three interaction models, recessive × recessive, dominant × dominant and additive × additive (S.T3, S.F4).

## 9. Analysis of Lp(a) variants

*Analysis of direct association between Trégouët haplotypes and MI risk.* We tested for association between haplotypes reported by Trégouët *et al.*[14] and risk of MI in the MIGen study and found similar results, with the CCTC ( $p=0.000077$ ; OR [95%CI]=1.71 [1.31,2.22]) and CTTG ( $p=0.0278$ ; OR=1.14 [1.01,1.28]) haplotypes showing similar effects on risk (more common in cases) to those previously reported, and in the same direction.

|         | Frequency in MIGen |       | odds ratio | 95% CI    | association p-value |
|---------|--------------------|-------|------------|-----------|---------------------|
|         | controls           | cases |            |           |                     |
| T C T C | 0.503              | 0.495 |            |           |                     |
| C C C G | 0.148              | 0.141 | 0.97       | 0.87,1.08 | 0.610541            |
| C C T C | 0.019              | 0.031 | 1.71       | 1.31,2.22 | 0.000077            |
| C C T G | 0.021              | 0.018 | 0.91       | 0.70,1.19 | 0.481655            |
| C T T G | 0.115              | 0.125 | 1.14       | 1.01,1.28 | 0.02776             |
| T T T C | 0.018              | 0.016 | 0.93       | 0.69,1.25 | 0.63506             |
| T T T G | 0.158              | 0.157 | 1.00       | 0.90,1.11 | 0.991476            |

Trégouët haplotypes are shown in columns 1 to 4, with SNPs in the following order: rs2048327, rs3127599, rs7767084, rs10755578

*Analysis of interaction between Trégouët haplotypes and CVRF SNPs as a predictor of MI risk.* We observed no significant evidence for interaction between the Trégouët haplotypes and 240 of the 242 CVRF SNPs, after correction for multiple testing (significance threshold,  $p=0.00021$ ). The *haplo.glm* regression models containing terms for interaction between the Trégouët haplotypes and rs1800961 and rs6919346 failed to converge. rs1800961 lies at the HNF4A locus and was previously reported to be associated with total and HDL cholesterol levels[16,17]. rs6919346 lies within LPA and was reported by Ober *et al.*[18] to be associated with plasma Lp(a) levels. The most significant p-value for interaction was observed for rs2068888 ( $p=0.0039$ ), which lies in *CYP26A1* and was previously reported to be associated with plasma triglyceride levels (S.T1).

## Tables

**Table 1:** Cardiovascular risk factor SNPs. Details of the SNPs associated with cardiovascular risk factors (CVRF) and clinical endpoints that were selected for interaction analysis in this study. The following data are shown for each of the 242 SNPs: the reported phenotype(s); nearby gene(s), if reported; p-value for association with MI in the MIGen study; MAF in MIGen controls; references for studies that discovered or replicated the association.

| SNP        | Chr | Reported Phenotype                                                  | Nearby Gene, if reported                           | p-value for MI in MIGen <sup>a</sup> | MAF in MIGen controls | Reference  |
|------------|-----|---------------------------------------------------------------------|----------------------------------------------------|--------------------------------------|-----------------------|------------|
| rs1333049  | 9   | Coronary disease                                                    | Intergenic; CDKN2A; CDKN2B                         | 3.42e-07                             | 0.483                 | [19,3]     |
| rs6725887  | 2   | Myocardial infarction (early onset)                                 | WDR12                                              | 8.55e-05                             | 0.126                 | [16]       |
| rs1121980  | 16  | Body mass index                                                     | FTO                                                | 0.00012                              | 0.437                 | [20]       |
| rs17465637 | 1   | Myocardial infarction (early onset)                                 | MIA3                                               | 0.00015                              | 0.293                 | [16]       |
| rs1746048  | 10  | Myocardial infarction (early onset)                                 | CXCL12                                             | 0.000161                             | 0.173                 | [16]       |
| rs1122608  | 19  | Myocardial infarction (early onset)                                 | LDLR                                               | 0.000172                             | 0.264                 | [16]       |
| rs12526453 | 6   | Myocardial infarction (early onset)                                 | PHACTR1                                            | 0.00046                              | 0.362                 | [16]       |
| rs2000999  | 16  | TC; LDL                                                             |                                                    | 0.000726                             | 0.208                 | [17]       |
| rs9982601  | 21  | Myocardial infarction (early onset)                                 | SLC5A3; MRPS6; KCNE2                               | 0.000782                             | 0.128                 | [16]       |
| rs964184   | 11  | HDL cholesterol; Triglycerides; TC; LDL; HDL; TG; CAD               | APOA1; APOC3; APOA4; APOA5; ZNF259; APOA5-A4-C3-A1 | 0.00122                              | 0.152                 | [21,17,22] |
| rs10423928 | 19  | Two-hour glucose challenge; CH                                      | GIPR                                               | 0.0014                               | 0.19                  | [5,6]      |
| rs7205804  | 16  | TG                                                                  |                                                    | 0.00148                              | 0.471                 | [17]       |
| rs2521501  | 15  | BP                                                                  |                                                    | 0.00153                              | 0.333                 | [23]       |
| rs3184504  | 12  | Diastolic blood pressure; Systolic blood pressure                   | SH2B3                                              | 0.00157                              | 0.483                 | [24]       |
| rs649129   | 9   | LDL                                                                 |                                                    | 0.00295                              | 0.231                 | [17]       |
| rs7350481  | 11  | Hematological and biochemical traits                                | APO-A cluster                                      | 0.00322                              | 0.079                 | [25]       |
| rs12779790 | 10  | Type 2 diabetes                                                     | CDC123; CAMK1D                                     | 0.00357                              | 0.178                 | [26]       |
| rs2814944  | 6   | HDL                                                                 |                                                    | 0.0038                               | 0.145                 | [17]       |
| rs6511720  | 19  | LDL cholesterol; TC; LDL                                            | LDLR                                               | 0.0047                               | 0.104                 | [16,27,17] |
| rs13139571 | 4   | BP                                                                  |                                                    | 0.00575                              | 0.273                 | [23]       |
| rs16948048 | 17  | Diastolic blood pressure                                            | ZNF652; PHB                                        | 0.0076                               | 0.368                 | [28]       |
| rs6544713  | 2   | LDL cholesterol                                                     | ABCG8                                              | 0.0106                               | 0.334                 | [16]       |
| rs2844479  | 6   | Weight                                                              | AIF1; NCR3                                         | 0.0109                               | 0.43                  | [29]       |
| rs2967605  | 19  | HDL cholesterol                                                     | ANGPTL4                                            | 0.0196                               | 0.169                 | [16]       |
| rs3177928  | 6   | TC; LDL                                                             |                                                    | 0.0209                               | 0.135                 | [17]       |
| rs11206510 | 1   | LDL cholesterol; Myocardial infarction (early onset)                | PCSK9                                              | 0.0212                               | 0.196                 | [21,16,27] |
| rs7593730  | 2   | Type 2 diabetes                                                     | RBMS1; ITGB6                                       | 0.0221                               | 0.219                 | [30]       |
| rs17114036 | 1   | CAD                                                                 | PPAP2B                                             | 0.0233                               | 0.109                 | [22]       |
| rs4773144  | 13  | CAD                                                                 | COL4A1; COL4A2                                     | 0.0247                               | 0.459                 | [22]       |
| rs1532085  | 15  | HDL cholesterol; TC; HDL                                            | LIPC                                               | 0.0259                               | 0.373                 | [31,32,17] |
| rs17584499 | 9   | Type 2 diabetes                                                     | PTPRD                                              | 0.0277                               | 0.181                 | [33]       |
| rs12970134 | 18  | Body mass index; Weight; Waist circumference and related phenotypes | MC4R                                               | 0.0303                               | 0.26                  | [29,34]    |
| rs16998073 | 4   | Diastolic blood pressure                                            | FGF5; PRDM8; c4orf22                               | 0.032                                | 0.207                 | [28]       |
| rs1004467  | 10  | Systolic blood pressure                                             | CYP17A1                                            | 0.033                                | 0.104                 | [24]       |
| rs2412710  | 15  | TG                                                                  |                                                    | 0.034                                | 0.029                 | [17]       |

|            |    |                                     |                                           |        |       |                  |
|------------|----|-------------------------------------|-------------------------------------------|--------|-------|------------------|
| rs261342   | 15 | TG                                  |                                           | 0.0442 | 0.205 | [17]             |
| rs11556924 | 7  | CAD                                 | ZC3HC1                                    | 0.0464 | 0.353 | [22]             |
| rs181362   | 22 | HDL                                 |                                           | 0.0535 | 0.196 | [17]             |
| rs2650000  | 12 | LDL cholesterol                     | HNF1A                                     | 0.0582 | 0.355 | [16]             |
| rs2072183  | 7  | TC                                  |                                           | 0.0583 | 0.209 | [17]             |
| rs4846914  | 1  | HDL cholesterol; Triglycerides; HDL | GALNT2                                    | 0.0583 | 0.404 | [21,16,17]       |
| rs17321515 | 8  | Triglycerides                       | TRIB1                                     | 0.0585 | 0.459 | [21,27]          |
| rs1689800  | 1  | HDL                                 |                                           | 0.0618 | 0.383 | [17]             |
| rs17609940 | 6  | CAD                                 | ANKS1A                                    | 0.063  | 0.144 | [22]             |
| rs7957197  | 12 | T2D                                 | HNF1A                                     | 0.0648 | 0.208 | [35]             |
| rs12670798 | 7  | LDL cholesterol; LDL                | DH11                                      | 0.0692 | 0.195 | [31,17]          |
| rs6922269  | 6  | Coronary disease                    | MTHFD1L                                   | 0.0702 | 0.248 | [19]             |
| rs599839   | 1  | LDL cholesterol; Coronary disease   | CELSR2; PSRC1; SORT1                      | 0.0777 | 0.213 | [36,27,19]       |
| rs4420638  | 19 | LDL cholesterol; TC; LDL; HDL       | APOE; APOC1; APOC4; APOC2                 | 0.0814 | 0.156 | [21,16,36,27,17] |
| rs6474412  | 8  | Smoking behavior; SMK               | CHRN3; CHR6                               | 0.0816 | 0.227 | [37]             |
| rs419076   | 3  | BP                                  |                                           | 0.0843 | 0.491 | [23]             |
| rs9818870  | 3  | Coronary artery disease             | MRAS                                      | 0.0873 | 0.137 | [38]             |
| rs6548238  | 2  | Body mass index                     | TMEM18                                    | 0.0902 | 0.194 | [39]             |
| rs2929282  | 15 | TG                                  |                                           | 0.0904 | 0.059 | [17]             |
| rs1501908  | 5  | LDL cholesterol                     | TIMD4; HAVCR1                             | 0.0953 | 0.39  | [16]             |
| rs7134375  | 12 | HDL                                 |                                           | 0.0973 | 0.395 | [17]             |
| rs1129555  | 10 | LDL                                 |                                           | 0.0978 | 0.325 | [17]             |
| rs1564348  | 6  | TC; LDL                             |                                           | 0.0979 | 0.155 | [17]             |
| rs1013442  | 11 | SMK                                 |                                           | 0.0981 | 0.271 | [40]             |
| rs10850411 | 12 | BP                                  |                                           | 0.103  | 0.32  | [23]             |
| rs16969968 | 15 | SMK                                 |                                           | 0.106  | 0.388 | [40]             |
| rs10946398 | 6  | Type 2 diabetes                     | CDKAL1                                    | 0.107  | 0.306 | [41]             |
| rs4373814  | 10 | BP                                  |                                           | 0.111  | 0.441 | [23]             |
| rs2652834  | 15 | HDL                                 |                                           | 0.112  | 0.209 | [17]             |
| rs4082919  | 17 | HDL                                 |                                           | 0.112  | 0.49  | [17]             |
| rs46522    | 17 | CAD                                 | UBE2Z; GIP; ATP5G1; SNF8                  | 0.112  | 0.472 | [22]             |
| rs2479409  | 1  | TC; LDL                             |                                           | 0.113  | 0.337 | [17]             |
| rs4607103  | 3  | Type 2 diabetes                     | ADAMTS9                                   | 0.116  | 0.292 | [26]             |
| rs1424233  | 16 | Obesity                             | MAF                                       | 0.117  | 0.49  | [42]             |
| rs2068888  | 10 | TG                                  |                                           | 0.124  | 0.484 | [17]             |
| rs7395662  | 11 | HDL cholesterol                     | MADD; FOLH1                               | 0.126  | 0.37  | [31]             |
| rs10938397 | 4  | Body mass index                     | GNPDA2                                    | 0.128  | 0.431 | [27]             |
| rs28927680 | 11 | Triglycerides                       | APOA1; APOC3; APOA4; APOA5; ZNF259; BUD13 | 0.128  | 0.074 | [21]             |
| rs2902941  | 20 | LDL                                 |                                           | 0.143  | 0.303 | [17]             |
| rs1552224  | 11 | T2D                                 | CENTD2                                    | 0.145  | 0.13  | [35]             |
| rs3846662  | 5  | LDL cholesterol                     | HMGCR                                     | 0.151  | 0.44  | [31]             |
| rs16942887 | 16 | HDL                                 |                                           | 0.153  | 0.119 | [17]             |
| rs7941030  | 11 | TC                                  |                                           | 0.159  | 0.358 | [17]             |
| rs386000   | 19 | HDL                                 |                                           | 0.162  | 0.155 | [17]             |
| rs2247056  | 6  | TG                                  |                                           | 0.169  | 0.168 | [17]             |
| rs4810479  | 20 | TG                                  |                                           | 0.171  | 0.232 | [17]             |
| rs3136441  | 11 | HDL                                 |                                           | 0.18   | 0.131 | [17]             |
| rs3742207  | 13 | Arterial stiffness                  | COL4A1                                    | 0.183  | 0.353 | [43]             |
| rs2814982  | 6  | TC                                  |                                           | 0.184  | 0.08  | [17]             |
| rs6450176  | 5  | HDL                                 |                                           | 0.186  | 0.288 | [17]             |
| rs7206971  | 17 | TC                                  |                                           | 0.192  | 0.483 | [17]             |
| rs805303   | 6  | BP                                  |                                           | 0.205  | 0.346 | [23]             |
| rs2877716  | 3  | Two-hour glucose challenge; CH      | ADCY5                                     | 0.21   | 0.214 | [5,6]            |
| rs7120118  | 11 | HDL cholesterol                     | NR1H3                                     | 0.21   | 0.251 | [32]             |
| rs5756931  | 22 | TG                                  |                                           | 0.213  | 0.404 | [17]             |

|            |    |                                    |                                 |       |       |         |
|------------|----|------------------------------------|---------------------------------|-------|-------|---------|
| rs13082711 | 3  | BP                                 |                                 | 0.215 | 0.215 | [23]    |
| rs6759321  | 2  | TC                                 |                                 | 0.216 | 0.491 | [17]    |
| rs1515100  | 2  | HDL                                |                                 | 0.231 | 0.374 | [17]    |
| rs12310367 | 12 | TG                                 |                                 | 0.235 | 0.365 | [17]    |
| rs7396835  | 11 | Quantitative traits                | Intergenic                      | 0.236 | 0.156 | [44]    |
| rs11084753 | 19 | Body mass index                    | KCTD15                          | 0.242 | 0.351 | [27]    |
| rs217386   | 7  | LDL                                |                                 | 0.247 | 0.453 | [17]    |
| rs987237   | 6  | Adiposity                          | TFAP2B                          | 0.247 | 0.17  | [45]    |
| rs11220462 | 11 | LDL                                |                                 | 0.259 | 0.132 | [17]    |
| rs10195252 | 2  | TG                                 |                                 | 0.263 | 0.394 | [17]    |
| rs243021   | 2  | T2D                                | BCL11A                          | 0.263 | 0.458 | [35]    |
| rs12946454 | 17 | Systolic blood pressure            | PLCD3; ACBD4; HEXIM1;<br>HEXIM2 | 0.291 | 0.269 | [28]    |
| rs11136341 | 8  | TC; LDL                            |                                 | 0.297 | 0.412 | [17]    |
| rs2384550  | 12 | Diastolic blood pressure           | TBX3; TBX5                      | 0.306 | 0.371 | [24]    |
| rs17216525 | 19 | Triglycerides                      | NCAN; CILP2; PBX4               | 0.316 | 0.075 | [16]    |
| rs925946   | 11 | Body mass index; Weight            | BDNF                            | 0.318 | 0.259 | [29]    |
| rs11953630 | 5  | BP                                 |                                 | 0.319 | 0.399 | [23]    |
| rs7255436  | 19 | HDL                                |                                 | 0.325 | 0.469 | [17]    |
| rs174570   | 11 | LDL cholesterol                    | FADS2; FADS3                    | 0.333 | 0.117 | [31]    |
| rs737337   | 19 | HDL                                |                                 | 0.335 | 0.085 | [17]    |
| rs581080   | 9  | TC                                 |                                 | 0.337 | 0.205 | [17]    |
| rs255049   | 16 | HDL cholesterol                    | LCAT                            | 0.345 | 0.211 | [32]    |
| rs11776767 | 8  | TG                                 |                                 | 0.354 | 0.381 | [17]    |
| rs1367117  | 2  | TC; LDL                            |                                 | 0.355 | 0.288 | [17]    |
| rs174601   | 11 | HDL                                |                                 | 0.357 | 0.341 | [17]    |
| rs4148008  | 17 | HDL                                |                                 | 0.357 | 0.337 | [17]    |
| rs3096277  | 16 | Blood pressure                     | CDH13                           | 0.362 | 0.195 | [24]    |
| rs17608766 | 17 | BP                                 |                                 | 0.367 | 0.144 | [23]    |
| rs2126259  | 8  | TC; LDL                            |                                 | 0.372 | 0.089 | [17]    |
| rs7961581  | 12 | Type 2 diabetes                    | TSPAN8; LGR5                    | 0.372 | 0.307 | [26]    |
| rs6754295  | 2  | HDL cholesterol; Triglycerides     | APOB                            | 0.374 | 0.256 | [31]    |
| rs326      | 8  | Triglycerides                      | LPL; C8orf35; SLC18A1           | 0.376 | 0.327 | [46]    |
| rs12130333 | 1  | Triglycerides                      | ANGPTL3; DOCK7; ATG4C           | 0.379 | 0.175 | [21]    |
| rs645040   | 3  | TG                                 |                                 | 0.382 | 0.226 | [17]    |
| rs4689388  | 4  | Type 2 diabetes and other traits   | WFS1; PPP2R2C                   | 0.384 | 0.393 | [47]    |
| rs391300   | 17 | Type 2 diabetes                    | SRR                             | 0.387 | 0.382 | [33]    |
| rs2254287  | 6  | LDL cholesterol                    | B3GALT4                         | 0.389 | 0.435 | [27]    |
| rs7034200  | 9  | Fasting glucose-related traits; CH | GLIS3                           | 0.39  | 0.486 | [6]     |
| rs1961456  | 8  | TC                                 |                                 | 0.397 | 0.321 | [17]    |
| rs2568958  | 1  | Body mass index; Weight            | NEGR1                           | 0.398 | 0.336 | [29]    |
| rs6919346  | 6  | Plasma Lp (a) levels               | LPA                             | 0.4   | 0.19  | [18]    |
| rs7498665  | 16 | Body mass index; Weight            | SH2B1; ATP2A1                   | 0.404 | 0.324 | [29,39] |
| rs442177   | 4  | TG                                 |                                 | 0.409 | 0.395 | [17]    |
| rs10761731 | 10 | TG                                 |                                 | 0.412 | 0.428 | [17]    |
| rs1084651  | 6  | HDL                                |                                 | 0.415 | 0.134 | [17]    |
| rs864745   | 7  | Type 2 diabetes                    | JAZF1                           | 0.415 | 0.491 | [26]    |
| rs7811265  | 7  | TG                                 |                                 | 0.418 | 0.162 | [17]    |
| rs10832963 | 11 | TC                                 |                                 | 0.419 | 0.284 | [17]    |
| rs1800961  | 20 | HDL cholesterol; TC; HDL           | HNF4A                           | 0.421 | 0.025 | [16,17] |
| rs3905000  | 9  | HDL cholesterol                    | ABCA1                           | 0.422 | 0.145 | [31]    |
| rs11649653 | 16 | TG                                 |                                 | 0.431 | 0.428 | [17]    |
| rs3825807  | 15 | CAD                                | ADAMTS7                         | 0.44  | 0.433 | [22]    |
| rs7647305  | 3  | Body mass index; Weight            | SFRS10; ETV5; DGKG              | 0.44  | 0.204 | [29]    |
| rs514230   | 1  | TC; LDL                            |                                 | 0.442 | 0.468 | [17]    |
| rs12190287 | 6  | CAD                                | TCF21                           | 0.444 | 0.368 | [22]    |
| rs2895811  | 14 | CAD                                | HHLPL1                          | 0.452 | 0.399 | [22]    |

|            |    |                                                               |                                        |       |       |            |
|------------|----|---------------------------------------------------------------|----------------------------------------|-------|-------|------------|
| rs1167998  | 1  | Triglycerides                                                 | DOCK7                                  | 0.462 | 0.307 | [31]       |
| rs340874   | 1  | Fasting glucose-related traits; CH                            | PROX1                                  | 0.465 | 0.489 | [6]        |
| rs3741414  | 12 | HDL                                                           |                                        | 0.467 | 0.193 | [17]       |
| rs11558471 | 8  | Fasting glucose-related traits                                | SLC30A8                                | 0.47  | 0.282 | [6]        |
| rs1799945  | 6  | BP                                                            |                                        | 0.479 | 0.157 | [23]       |
| rs1329650  | 10 | Smoking behavior; SMK                                         | LOC100188947                           | 0.48  | 0.259 | [40]       |
| rs4759375  | 12 | HDL                                                           |                                        | 0.49  | 0.061 | [17]       |
| rs10892151 | 11 | Triglycerides                                                 | APOA1; APOC3; APOA4;<br>APOA5; DSCAML1 | 0.511 | 0.032 | [48]       |
| rs2075292  | 11 | Triglycerides                                                 | APOA1; KIAA0999;<br>LOC645044          | 0.52  | 0.133 | [46]       |
| rs17367504 | 1  | Systolic blood pressure                                       | MTHFR; NPPA; CLCN6;<br>NPPB; AGTRAP    | 0.523 | 0.129 | [28]       |
| rs13107325 | 4  | HDL; BP                                                       |                                        | 0.525 | 0.083 | [17,23]    |
| rs3757354  | 6  | TC; LDL                                                       |                                        | 0.529 | 0.196 | [17]       |
| rs11920090 | 3  | Fasting glucose-related traits; CH                            | SLC2A2                                 | 0.532 | 0.151 | [6]        |
| rs231362   | 11 | T2D                                                           | KCNQ1                                  | 0.533 | 0.486 | [35]       |
| rs10885122 | 10 | Fasting glucose-related traits; CH                            | ADRA2A                                 | 0.536 | 0.129 | [6]        |
| rs2293889  | 8  | HDL                                                           |                                        | 0.552 | 0.398 | [17]       |
| rs4939883  | 18 | HDL cholesterol; smallLDL                                     | LIPG                                   | 0.554 | 0.159 | [31,16,7]  |
| rs515135   | 2  | LDL cholesterol                                               | APOB                                   | 0.555 | 0.186 | [16]       |
| rs11153594 | 6  | LDL                                                           |                                        | 0.558 | 0.411 | [17]       |
| rs4149268  | 9  | HDL cholesterol                                               | ABCA1                                  | 0.578 | 0.392 | [27]       |
| rs643531   | 9  | HDL                                                           |                                        | 0.596 | 0.138 | [17]       |
| rs2290159  | 3  | TC                                                            |                                        | 0.607 | 0.215 | [17]       |
| rs10146997 | 14 | Waist circumference                                           | NRXN3                                  | 0.611 | 0.188 | [49]       |
| rs2332328  | 14 | LDL                                                           |                                        | 0.616 | 0.484 | [17]       |
| rs12936587 | 17 | CAD                                                           | RASD1; SMCR3; PEMT                     | 0.618 | 0.43  | [22]       |
| rs11634397 | 15 | T2D                                                           | ZFAND6                                 | 0.619 | 0.341 | [35]       |
| rs4731702  | 7  | HDL                                                           |                                        | 0.621 | 0.462 | [17]       |
| rs1030431  | 8  | TC; LDL                                                       |                                        | 0.624 | 0.36  | [17]       |
| rs7944584  | 11 | Fasting glucose-related traits; CH                            | MADD                                   | 0.625 | 0.317 | [6]        |
| rs12328675 | 2  | HDL                                                           |                                        | 0.63  | 0.139 | [17]       |
| rs10830963 | 11 | Fasting glucose-related traits;<br>Fasting plasma glucose; CH | MTNR1B                                 | 0.633 | 0.281 | [6,50]     |
| rs7129220  | 11 | BP                                                            |                                        | 0.638 | 0.116 | [23]       |
| rs1111875  | 10 | Type 2 diabetes                                               | HHEX                                   | 0.641 | 0.393 | [51,52,53] |
| rs2166706  | 11 | Fasting plasma glucose                                        | MTNR1B                                 | 0.641 | 0.42  | [54]       |
| rs11014166 | 10 | Diastolic blood pressure                                      | CACNB2                                 | 0.643 | 0.375 | [24]       |
| rs932764   | 10 | BP                                                            |                                        | 0.647 | 0.415 | [23]       |
| rs2681492  | 12 | Systolic blood pressure                                       | ATP2B1                                 | 0.65  | 0.198 | [24]       |
| rs7826222  | 8  | Adiposity                                                     | MSRA                                   | 0.658 | 0.192 | [45]       |
| rs7578597  | 2  | Type 2 diabetes                                               | THADA                                  | 0.667 | 0.107 | [26]       |
| rs2923084  | 11 | HDL                                                           |                                        | 0.67  | 0.192 | [17]       |
| rs1327235  | 20 | BP                                                            |                                        | 0.68  | 0.458 | [23]       |
| rs6102059  | 20 | LDL cholesterol                                               | MAFB                                   | 0.694 | 0.27  | [16]       |
| rs2277862  | 20 | TC                                                            |                                        | 0.697 | 0.18  | [17]       |
| rs2807834  | 1  | TC; LDL                                                       |                                        | 0.698 | 0.322 | [17]       |
| rs3774372  | 3  | BP                                                            |                                        | 0.701 | 0.204 | [23]       |
| rs2191349  | 7  | Fasting glucose-related traits; CH                            | DGKB; TMEM195                          | 0.705 | 0.451 | [6]        |
| rs1173771  | 5  | BP                                                            |                                        | 0.709 | 0.394 | [23]       |
| rs11071657 | 15 | Fasting glucose-related traits; CH                            | C2CD4B                                 | 0.713 | 0.363 | [6]        |
| rs492602   | 19 | TC                                                            |                                        | 0.713 | 0.479 | [17]       |
| rs3733829  | 19 | Smoking behavior; SMK                                         | CYP2A6; EGLN2                          | 0.714 | 0.368 | [40]       |
| rs10096633 | 8  | Triglycerides; Other metabolic<br>traits                      | LPL                                    | 0.716 | 0.156 | [31,32]    |
| rs7515577  | 1  | TC                                                            |                                        | 0.716 | 0.189 | [17]       |
| rs4105144  | 19 | Smoking behavior; SMK                                         | CYP2A6; RAB4D                          | 0.717 | 0.284 | [37]       |



|            |    |                                                                                          |                                          |       |       |                  |
|------------|----|------------------------------------------------------------------------------------------|------------------------------------------|-------|-------|------------------|
| rs381815   | 11 | Systolic blood pressure                                                                  | PLEKHA7                                  | 0.726 | 0.252 | [24]             |
| rs10923931 | 1  | Type 2 diabetes                                                                          | NOTCH2; ADAM30                           | 0.735 | 0.098 | [26]             |
| rs7134594  | 12 | HDL                                                                                      |                                          | 0.736 | 0.442 | [17]             |
| rs1260326  | 2  | Triglycerides; Other metabolic traits; Two-hour glucose challenge; CH; TC; TG; largeHDL. | GCKR                                     | 0.743 | 0.474 | [16,32,5,6,17,7] |
| rs9989419  | 16 | HDL cholesterol                                                                          | CETP                                     | 0.744 | 0.404 | [55,27]          |
| rs4506565  | 10 | Type 2 diabetes; Fasting glucose-related traits                                          | TCF7L2                                   | 0.747 | 0.356 | [3,6]            |
| rs560887   | 2  | Fasting glucose-related traits; Other metabolic traits; Fasting plasma glucose; CH       | G6PC2; ABCB11                            | 0.749 | 0.281 | [6,32,50,56]     |
| rs3025343  | 9  | Smoking behavior; SMK                                                                    | DBH                                      | 0.754 | 0.101 | [40]             |
| rs7832552  | 8  | Body mass (lean)                                                                         | TRHR                                     | 0.755 | 0.278 | [57]             |
| rs909802   | 20 | LDL                                                                                      |                                          | 0.759 | 0.469 | [17]             |
| rs5215     | 11 | Type 2 diabetes                                                                          | KCNJ11                                   | 0.761 | 0.361 | [41]             |
| rs896854   | 8  | T2D                                                                                      | TP53INP1                                 | 0.765 | 0.474 | [35]             |
| rs17271305 | 15 | CH                                                                                       |                                          | 0.768 | 0.368 | [6]              |
| rs2605100  | 1  | Adiposity                                                                                | LYPLAL1                                  | 0.769 | 0.272 | [45]             |
| rs2737229  | 8  | TC                                                                                       |                                          | 0.77  | 0.285 | [17]             |
| rs881844   | 17 | HDL                                                                                      |                                          | 0.771 | 0.328 | [17]             |
| rs2925979  | 16 | HDL                                                                                      |                                          | 0.772 | 0.298 | [17]             |
| rs9686661  | 5  | TG                                                                                       |                                          | 0.791 | 0.217 | [17]             |
| rs838880   | 12 | HDL                                                                                      |                                          | 0.8   | 0.323 | [17]             |
| rs11605924 | 11 | Fasting glucose-related traits; CH                                                       | CRY2                                     | 0.814 | 0.468 | [6]              |
| rs2237892  | 11 | Type 2 diabetes                                                                          | KCNQ1                                    | 0.815 | 0.054 | [51,58]          |
| rs4607517  | 7  | Fasting glucose-related traits; Fasting plasma glucose; CH                               | GCK                                      | 0.823 | 0.191 | [6,50]           |
| rs633185   | 11 | BP                                                                                       |                                          | 0.841 | 0.27  | [23]             |
| rs1800562  | 6  | TC; LDL                                                                                  |                                          | 0.857 | 0.037 | [17]             |
| rs693      | 2  | LDL cholesterol                                                                          | APOB                                     | 0.861 | 0.461 | [31,32,21]       |
| rs35767    | 12 | Fasting glucose-related traits; Fasting insulin-related traits; CH                       | IGF1                                     | 0.865 | 0.181 | [6]              |
| rs6015450  | 20 | BP                                                                                       |                                          | 0.868 | 0.104 | [23]             |
| rs2932538  | 1  | BP                                                                                       |                                          | 0.886 | 0.275 | [23]             |
| rs7225700  | 17 | LDL                                                                                      |                                          | 0.888 | 0.336 | [17]             |
| rs8042680  | 15 | T2D                                                                                      | PRC1                                     | 0.896 | 0.361 | [35]             |
| rs6495122  | 15 | Diastolic blood pressure                                                                 | CSK; ULK3                                | 0.903 | 0.493 | [24]             |
| rs10913469 | 1  | Weight                                                                                   | SEC16B; RASAL2                           | 0.914 | 0.171 | [29]             |
| rs6499640  | 16 | Body mass index; Weight                                                                  | FTO                                      | 0.915 | 0.389 | [29]             |
| rs6769511  | 3  | Type 2 diabetes                                                                          | IGF2BP2                                  | 0.918 | 0.313 | [59]             |
| rs12027135 | 1  | TC; LDL                                                                                  |                                          | 0.93  | 0.494 | [17]             |
| rs4660293  | 1  | HDL                                                                                      |                                          | 0.934 | 0.225 | [17]             |
| rs2383208  | 9  | Type 2 diabetes                                                                          | CDKN2A; CDKN2B                           | 0.935 | 0.193 | [51]             |
| rs1530440  | 10 | Diastolic blood pressure                                                                 | c10orf107; TMEM26; RTKN2; RHOTB1; ARID5B | 0.944 | 0.187 | [28]             |
| rs1531343  | 12 | T2D                                                                                      | HMG2A2                                   | 0.945 | 0.141 | [35]             |
| rs10838738 | 11 | Body mass index                                                                          | MTCH2                                    | 0.953 | 0.339 | [39]             |
| rs13292136 | 9  | T2D                                                                                      | CHCHD9                                   | 0.955 | 0.053 | [35]             |
| rs605066   | 6  | HDL                                                                                      |                                          | 0.961 | 0.414 | [17]             |
| rs7819412  | 8  | Triglycerides                                                                            | XKR6; AMAC1L2                            | 0.967 | 0.492 | [16]             |

<sup>a</sup> p-value for association with MI in the MIGen study, with adjustment for age, sex and genetic principal components

**Table 2:** Results for top interactions in MIGen, validation in WTCCC, and meta-analysis. SNP pairs with p-value for interaction in the MIGen study within 3 orders of magnitude of the significance threshold in each Analysis are shown in order of decreasing significance. Results for Analyses 2, 3a and 3b are shown on the following three pages.

**Analysis 1**

| SNP1       | SNP2       | MAF SNP1 <sup>a</sup> | MAF SNP2 <sup>a</sup> | Discovery Phenotype SNP1 | Discovery Phenotype SNP2 | MIGen interaction p-value | WTCCC interaction p-value | Meta-analysis interaction p-value |
|------------|------------|-----------------------|-----------------------|--------------------------|--------------------------|---------------------------|---------------------------|-----------------------------------|
| rs2072183  | rs1013442  | 0.209                 | 0.271                 | TC; LDL                  | SMK                      | 5.54E-06                  | 8.39E-01                  | 2.08E-02                          |
| rs11220462 | rs5756931  | 0.132                 | 0.404                 | TC; LDL                  | TG                       | 8.32E-06                  | 3.99E-01                  | 7.25E-04                          |
| rs7120118  | rs4810479  | 0.251                 | 0.232                 | HDL                      | TG; HDL                  | 4.75E-05                  | 5.77E-01                  | 7.55E-03                          |
| rs2737229  | rs381815   | 0.285                 | 0.252                 | TC                       | BP                       | 6.83E-05                  | 8.62E-02                  | 2.78E-04                          |
| rs3774372  | rs2923084  | 0.204                 | 0.192                 | BP                       | HDL                      | 8.77E-05                  | 9.36E-01                  | 9.91E-03                          |
| rs1800562  | rs7350481  | 0.037                 | 0.079                 | TC; LDL                  | TG                       | 1.22E-04                  | 9.00E-01                  | 3.83E-02                          |
| rs11776767 | rs10146997 | 0.381                 | 0.188                 | TG                       | OB                       | 1.67E-04                  | 9.12E-02                  | 1.85E-01                          |
| rs3177928  | rs925946   | 0.135                 | 0.259                 | TC; LDL                  | OB                       | 1.72E-04                  | 4.07E-01                  | 2.75E-03                          |
| rs12190287 | rs1030431  | 0.368                 | 0.360                 | MI/CAD                   | TC; LDL                  | 2.34E-04                  | 5.05E-01                  | 2.18E-04                          |
| rs645040   | rs12190287 | 0.226                 | 0.368                 | TG                       | CAD                      | 2.85E-04                  | 4.13E-03                  | 1.37E-01                          |
| rs2126259  | rs1129555  | 0.089                 | 0.325                 | TC; LDL; HDL             | TC; LDL                  | 2.88E-04                  | 4.28E-01                  | 9.06E-02                          |
| rs11558471 | rs231362   | 0.282                 | 0.486                 | CH                       | CH                       | 3.01E-04                  | 2.54E-01                  | 2.10E-02                          |
| rs2807834  | rs9982601  | 0.322                 | 0.128                 | TC; LDL                  | MI/CAD                   | 3.05E-04                  | 2.37E-01                  | 6.98E-04                          |
| rs6759321  | rs7961581  | 0.491                 | 0.307                 | TC                       | CH                       | 3.08E-04                  | 8.04E-01                  | 3.06E-03                          |
| rs6474412  | rs1746048  | 0.227                 | 0.173                 | SMK                      | MI/CAD                   | 3.23E-04                  | 1.87E-02                  | 5.81E-02                          |
| rs10892151 | rs6102059  | 0.032                 | 0.270                 | TG                       | LDL                      | 3.55E-04                  | 9.27E-01                  | 1.92E-02                          |
| rs1329650  | rs16969968 | 0.259                 | 0.388                 | SMK                      | SMK                      | 5.56E-04                  | 4.73E-01                  | 2.08E-03                          |
| rs2247056  | rs11556924 | 0.168                 | 0.353                 | TG                       | MI/CAD                   | 5.85E-04                  | 3.65E-01                  | 8.09E-03                          |
| rs693      | rs2254287  | 0.461                 | 0.435                 | LDL                      | LDL                      | 5.94E-04                  | 4.27E-01                  | 3.39E-02                          |
| rs7578597  | rs11953630 | 0.107                 | 0.399                 | CH                       | BP                       | 6.11E-04                  | 5.23E-01                  | 6.86E-02                          |
| rs12027135 | rs11920090 | 0.494                 | 0.151                 | TC; LDL                  | CH                       | 6.12E-04                  | 5.10E-02                  | 9.70E-03                          |
| rs599839   | rs7129220  | 0.213                 | 0.116                 | LDL; MI/CAD              | BP                       | 6.60E-04                  | 2.27E-02                  | 1.23E-01                          |
| rs10096633 | rs1121980  | 0.156                 | 0.437                 | TG                       | OB                       | 6.80E-04                  | 5.16E-01                  | 6.96E-02                          |
| rs4607103  | rs6919346  | 0.292                 | 0.190                 | CH                       | LP(a)                    | 7.18E-04                  | 1.70E-02                  | 1.49E-05                          |
| rs13082711 | rs7255436  | 0.215                 | 0.469                 | BP                       | HDL                      | 7.24E-04                  | 6.79E-01                  | 8.63E-02                          |
| rs7832552  | rs4939883  | 0.278                 | 0.159                 | OB                       | HDL; smallLDL            | 7.51E-04                  | 3.18E-01                  | 7.49E-03                          |
| rs2650000  | rs12946454 | 0.355                 | 0.269                 | LDL                      | BP                       | 7.53E-04                  | 4.17E-01                  | 4.93E-03                          |
| rs7350481  | rs12946454 | 0.079                 | 0.269                 | TG                       | BP                       | 7.92E-04                  | 6.45E-01                  | 1.42E-02                          |
| rs16998073 | rs2166706  | 0.207                 | 0.420                 | BP                       | CH                       | 8.08E-04                  | 9.71E-01                  | 3.79E-02                          |
| rs9818870  | rs6450176  | 0.137                 | 0.288                 | MI/CAD                   | HDL                      | 8.14E-04                  | 5.38E-01                  | 5.34E-03                          |
| rs11220462 | rs6495122  | 0.132                 | 0.493                 | TC; LDL                  | BP                       | 8.31E-04                  | 5.20E-01                  | 4.46E-02                          |
| rs7826222  | rs4810479  | 0.192                 | 0.232                 | OB                       | TG; HDL                  | 8.87E-04                  | --                        | --                                |
| rs391300   | rs2277862  | 0.382                 | 0.180                 | CH                       | TC                       | 8.93E-04                  | 2.67E-01                  | 4.95E-04                          |
| rs514230   | rs881844   | 0.468                 | 0.328                 | TC; LDL                  | HDL                      | 8.98E-04                  | 4.36E-01                  | 5.83E-03                          |
| rs1333049  | rs11071657 | 0.483                 | 0.363                 | MI/CAD                   | CH                       | 9.18E-04                  | 1.60E-01                  | 1.02E-02                          |
| rs46522    | rs1327235  | 0.472                 | 0.458                 | MI/CAD                   | BP                       | 9.29E-04                  | 6.59E-01                  | 5.36E-03                          |
| rs11014166 | rs1746048  | 0.375                 | 0.173                 | BP                       | MI/CAD                   | 9.31E-04                  | 6.44E-01                  | 9.06E-03                          |
| rs2075292  | rs2412710  | 0.133                 | 0.029                 | TG                       | TG                       | 9.50E-04                  | 8.13E-02                  | 1.48E-01                          |
| rs605066   | rs6495122  | 0.414                 | 0.493                 | HDL                      | BP                       | 9.95E-04                  | 8.13E-02                  | 9.39E-02                          |
| rs13292136 | rs909802   | 0.053                 | 0.469                 | CH                       | TC; LDL                  | 9.98E-04                  | 3.00E-01                  | -- <sup>b</sup>                   |
| rs3905000  | rs10761731 | 0.145                 | 0.428                 | HDL                      | TG                       | 1.02E-03                  | 6.14E-01                  | 2.54E-03                          |
| rs2844479  | rs12779790 | 0.430                 | 0.178                 | OB                       | CH                       | 1.06E-03                  | 2.81E-01                  | 1.95E-02                          |
| rs4846914  | rs1800961  | 0.404                 | 0.025                 | HDL; TG                  | TC; HDL                  | 1.10E-03                  | 2.35E-01                  | 3.32E-02                          |
| rs605066   | rs1084651  | 0.414                 | 0.134                 | HDL                      | HDL                      | 1.12E-03                  | 5.76E-01                  | 2.49E-03                          |
| rs1367117  | rs6544713  | 0.288                 | 0.334                 | TC; LDL                  | LDL                      | 1.15E-03                  | 1.31E-01                  | 2.40E-04                          |
| rs7350481  | rs2902941  | 0.079                 | 0.303                 | TG                       | TC; LDL                  | 1.17E-03                  | 4.77E-01                  | 2.81E-02                          |
| rs1129555  | rs4506565  | 0.325                 | 0.356                 | TC; LDL                  | CH                       | 1.20E-03                  | 3.92E-01                  | 9.80E-02                          |
| rs987237   | rs28927680 | 0.170                 | 0.074                 | OB                       | TG                       | 1.31E-03                  | 3.31E-02                  | 1.44E-02                          |

<sup>a</sup> Minor allele frequency in MIGen controls

<sup>b</sup> Data were available for both SNPs in this pair, but the meta-analysis model returned an unreliable result due to extreme variance in for some of the interaction terms

## Analysis 2

| SNP1       | SNP2       | MAF SNP1 <sup>a</sup> | MAF SNP2 <sup>a</sup> | p-value for MI, SNP1 <sup>c</sup> | p-value for MI, SNP2 <sup>c</sup> | MIGen interaction p-value | WTCCC interaction p-value | Meta-analysis interaction p-value |
|------------|------------|-----------------------|-----------------------|-----------------------------------|-----------------------------------|---------------------------|---------------------------|-----------------------------------|
| rs3136441  | rs9990208  | 0.123                 | 0.091                 | 1.80E-01                          | 1.20E-04                          | 9.48E-07                  | 8.36E-02                  | 1.52E-02                          |
| rs3733829  | rs7141502  | 0.368                 | 0.333                 | 7.14E-01                          | 9.68E-04                          | 9.78E-06                  | 1.24E-01                  | 1.65E-03                          |
| rs2293889  | rs4076319  | 0.398                 | 0.171                 | 5.52E-01                          | 7.26E-04                          | 9.83E-06                  | 1.67E-01                  | 4.50E-05                          |
| rs12328675 | rs12899875 | 0.137                 | 0.073                 | 6.30E-01                          | 5.39E-04                          | 1.21E-05                  | 3.25E-01                  | 1.80E-04                          |
| rs805303   | rs12511169 | 0.346                 | 0.365                 | 2.05E-01                          | 1.36E-04                          | 1.84E-05                  | 2.06E-01                  | 3.07E-03                          |
| rs11776767 | rs929280   | 0.38                  | 0.038                 | 3.54E-01                          | 6.15E-04                          | 2.86E-05                  | 1.00E+00                  | 3.79E-03                          |
| rs12328675 | rs2406422  | 0.137                 | 0.265                 | 6.30E-01                          | 5.06E-04                          | 3.23E-05                  | 3.76E-01                  | 2.31E-03                          |
| rs4846914  | rs974819   | 0.404                 | 0.292                 | 5.83E-02                          | 7.01E-04                          | 3.58E-05                  | 3.92E-02                  | 5.44E-04                          |
| rs11920090 | rs890022   | 0.15                  | 0.109                 | 5.32E-01                          | 7.38E-04                          | 4.44E-05                  | 2.18E-01                  | 5.09E-01                          |
| rs693      | rs7085495  | 0.461                 | 0.004                 | 8.61E-01                          | 2.56E-04                          | 5.05E-05                  | 2.00E-01                  | 1.25E-01                          |
| rs3846662  | rs1457480  | 0.44                  | 0.089                 | 1.51E-01                          | 1.54E-04                          | 5.60E-05                  | 5.90E-01                  | 3.33E-02                          |
| rs2166706  | rs17202030 | 0.406                 | 0.444                 | 6.41E-01                          | 8.05E-04                          | 5.96E-05                  | 8.00E-01                  | 1.56E-02                          |
| rs1746048  | rs4864534  | 0.173                 | 0.016                 | 1.61E-04                          | 3.04E-04                          | 6.75E-05                  | 1.42E-01                  | 1.54E-01                          |
| rs7961581  | rs11227513 | 0.307                 | 0.099                 | 3.72E-01                          | 4.11E-04                          | 8.07E-05                  | 5.60E-01                  | 7.66E-03                          |
| rs16942887 | rs12619970 | 0.119                 | 0.282                 | 1.53E-01                          | 3.59E-04                          | 8.09E-05                  | --                        | --                                |
| rs3905000  | rs7161989  | 0.145                 | 0.262                 | 4.22E-01                          | 3.01E-04                          | 8.10E-05                  | 1.09E-01                  | 6.94E-03                          |
| rs1333049  | rs4686947  | 0.483                 | 0.167                 | 3.42E-07                          | 2.83E-04                          | 8.28E-05                  | 1.33E-01                  | 1.41E-05                          |
| rs7826222  | rs4876804  | 0.167                 | 0.266                 | 6.58E-01                          | 8.05E-04                          | 9.24E-05                  | --                        | --                                |
| rs12936587 | rs7940379  | 0.434                 | 0.204                 | 6.18E-01                          | 9.33E-04                          | 9.34E-05                  | 8.46E-01                  | 2.92E-03                          |
| rs1530440  | rs12941859 | 0.187                 | 0.205                 | 9.44E-01                          | 3.82E-04                          | 9.38E-05                  | 8.07E-01                  | 1.02E-02                          |
| rs1531343  | rs6000401  | 0.141                 | 0.026                 | 9.45E-01                          | 2.28E-04                          | 9.40E-05                  | 8.09E-01                  | 1.16E-01                          |
| rs340874   | rs1573809  | 0.487                 | 0.055                 | 4.65E-01                          | 6.01E-04                          | 1.05E-04                  | 2.58E-01                  | 6.68E-04                          |
| rs10423928 | rs299467   | 0.097                 | 0.311                 | 1.40E-03                          | 7.61E-04                          | 1.05E-04                  | 1.40E-01                  | 4.48E-03                          |
| rs11605924 | rs12346989 | 0.468                 | 0.048                 | 8.14E-01                          | 6.43E-04                          | 1.08E-04                  | 4.94E-01                  | 4.33E-01                          |
| rs3741414  | rs12641856 | 0.137                 | 0.053                 | 4.67E-01                          | 6.08E-04                          | 1.09E-04                  | 3.38E-01                  | 4.66E-02                          |
| rs28927680 | rs4490836  | 0.074                 | 0.475                 | 1.28E-01                          | 6.68E-04                          | 1.22E-04                  | 1.66E-01                  | 1.96E-02                          |
| rs6548238  | rs12595857 | 0.19                  | 0.51                  | 9.02E-02                          | 9.26E-04                          | 1.26E-04                  | 4.48E-01                  | 2.26E-04                          |
| rs492602   | rs17069996 | 0.424                 | 0.058                 | 7.13E-01                          | 1.25E-04                          | 1.28E-04                  | --                        | --                                |
| rs1329650  | rs4876804  | 0.259                 | 0.266                 | 4.80E-01                          | 8.05E-04                          | 1.36E-04                  | 8.03E-02                  | 4.16E-04                          |
| rs11084753 | rs12497236 | 0.351                 | 0.099                 | 2.42E-01                          | 7.49E-04                          | 1.45E-04                  | 1.92E-01                  | 2.00E-02                          |
| rs231362   | rs736288   | 0.47                  | 0.048                 | 5.33E-01                          | 1.00E-03                          | 1.54E-04                  | 2.60E-01                  | 7.98E-03                          |
| rs4373814  | rs10050400 | 0.443                 | 0.028                 | 1.11E-01                          | 9.64E-04                          | 1.58E-04                  | 3.04E-01                  | 8.30E-04                          |
| rs599839   | rs12286002 | 0.213                 | 0.056                 | 7.77E-02                          | 6.29E-04                          | 1.73E-04                  | 3.87E-01                  | 1.06E-01                          |
| rs1689800  | rs9939575  | 0.381                 | 0.081                 | 6.18E-02                          | 7.73E-04                          | 1.73E-04                  | 7.94E-02                  | 2.10E-01                          |
| rs16948048 | rs751984   | 0.368                 | 0.071                 | 7.60E-03                          | 3.23E-04                          | 1.90E-04                  | 7.55E-01                  | 1.61E-02                          |
| rs3825807  | rs12320080 | 0.438                 | 0.083                 | 4.40E-01                          | 4.43E-05                          | 1.90E-04                  | 6.00E-01                  | 5.73E-02                          |
| rs2237892  | rs749146   | 0.052                 | 0.465                 | 8.15E-01                          | 7.05E-04                          | 2.02E-04                  | 6.77E-02                  | 3.62E-03                          |
| rs2072183  | rs3794986  | 0.131                 | 0.418                 | 5.83E-02                          | 4.89E-04                          | 2.14E-04                  | 6.35E-01                  | 1.21E-02                          |
| rs649129   | rs4298013  | 0.231                 | 0.448                 | 2.95E-03                          | 4.72E-04                          | 2.17E-04                  | 8.93E-01                  | 1.73E-02                          |
| rs2814944  | rs4241895  | 0.145                 | 0.21                  | 3.80E-03                          | 9.59E-04                          | 2.23E-04                  | 9.92E-01                  | 1.53E-02                          |
| rs2605100  | rs2890593  | 0.272                 | 0.423                 | 7.69E-01                          | 8.15E-04                          | 2.25E-04                  | 5.88E-01                  | 8.45E-04                          |
| rs7129220  | rs11723612 | 0.116                 | 0.296                 | 6.38E-01                          | 9.70E-04                          | 2.36E-04                  | 6.47E-01                  | 4.02E-02                          |
| rs11136341 | rs12806315 | 0.358                 | 0.025                 | 2.97E-01                          | 1.91E-04                          | 2.39E-04                  | 6.20E-01                  | 2.66E-02                          |
| rs11014166 | rs10483099 | 0.375                 | 0.166                 | 6.43E-01                          | 5.75E-04                          | 2.50E-04                  | 4.86E-01                  | 6.92E-03                          |
| rs6015450  | rs3112998  | 0.103                 | 0.412                 | 8.68E-01                          | 4.19E-04                          | 2.57E-04                  | 7.61E-01                  | 2.80E-02                          |
| rs2191349  | rs10003420 | 0.452                 | 0.043                 | 7.05E-01                          | 1.60E-05                          | 2.66E-04                  | 9.59E-01                  | 1.22E-01                          |
| rs12190287 | rs12211268 | 0.368                 | 0.463                 | 4.44E-01                          | 9.60E-04                          | 2.69E-04                  | 4.60E-01                  | 4.10E-02                          |
| rs3846662  | rs4947084  | 0.44                  | 0.127                 | 1.51E-01                          | 7.04E-04                          | 2.80E-04                  | 2.63E-01                  | 1.13E-02                          |
| rs7515577  | rs4917465  | 0.189                 | 0.247                 | 7.16E-01                          | 5.97E-04                          | 2.82E-04                  | 8.28E-01                  | 3.71E-03                          |
| rs2605100  | rs7634628  | 0.272                 | 0.172                 | 7.69E-01                          | 4.70E-04                          | 2.86E-04                  | 7.14E-02                  | 2.50E-04                          |
| rs6474412  | rs7272983  | 0.177                 | 0.114                 | 8.16E-02                          | 3.58E-04                          | 2.96E-04                  | 9.45E-01                  | 2.51E-01                          |
| rs4939883  | rs9533737  | 0.159                 | 0.33                  | 5.54E-01                          | 5.37E-04                          | 3.05E-04                  | 9.73E-01                  | 1.69E-02                          |

<sup>a</sup> Minor allele frequency in MIGen controls

<sup>b</sup> Data were available for both SNPs in this pair, but the meta-analysis model returned an unreliable result due to extreme variance in for some of the interaction terms

<sup>c</sup> p-value for association with MI in the MIGen study (adjusted for age, sex and IBS principal components; additive genetic model)

### Analysis 3a

| SNP1       | SNP2       | MAF SNP1 <sup>a</sup> | MAF SNP2 <sup>a</sup> | p-value for MI, SNP1 <sup>c</sup> | p-value for MI, SNP2 <sup>c</sup> | MIGen interaction p-value | WTCCC interaction p-value | Meta-analysis interaction p-value |
|------------|------------|-----------------------|-----------------------|-----------------------------------|-----------------------------------|---------------------------|---------------------------|-----------------------------------|
| rs761174   | rs167490   | 0.257                 | 0.016                 | 1.75E-05                          | 5.92E-04                          | 3.49E-06                  | 5.90E-03                  | 9.63E-03                          |
| rs7614572  | rs4241895  | 0.335                 | 0.21                  | 5.92E-04                          | 9.59E-04                          | 3.19E-05                  | 9.23E-01                  | 1.29E-01                          |
| rs17081749 | rs11138270 | 0.09                  | 0.071                 | 4.75E-04                          | 5.59E-04                          | 3.88E-05                  | 7.60E-01                  | 2.66E-02                          |
| rs16920992 | rs6540043  | 0.009                 | 0.502                 | 5.75E-04                          | 8.03E-04                          | 4.11E-05                  | 9.51E-01                  | 8.75E-02                          |
| rs2906289  | rs2871006  | 0.481                 | 0.296                 | 9.49E-04                          | 8.93E-04                          | 5.44E-05                  | 7.86E-02                  | 1.06E-04                          |
| rs2513403  | rs11616460 | 0.27                  | 0.375                 | 6.22E-04                          | 8.09E-04                          | 6.51E-05                  | 8.74E-01                  | 8.73E-03                          |
| rs2034441  | rs7932813  | 0.196                 | 0.183                 | 7.56E-04                          | 9.37E-04                          | 6.71E-05                  | 9.28E-01                  | 2.50E-02                          |
| rs5882     | rs2434853  | 0.286                 | 0.101                 | 3.10E-04                          | 6.64E-04                          | 6.78E-05                  | 4.13E-01                  | 1.15E-03                          |
| rs12941859 | rs12626156 | 0.205                 | 0.008                 | 3.82E-04                          | 2.50E-04                          | 6.91E-05                  | --                        | --                                |
| rs1034383  | rs12341867 | 0.413                 | 0.044                 | 3.66E-04                          | 3.19E-05                          | 7.19E-05                  | 8.51E-01                  | 7.20E-03                          |
| rs4233508  | rs550517   | 0.302                 | 0.478                 | 7.57E-04                          | 9.45E-04                          | 7.56E-05                  | 3.63E-01                  | 7.13E-04                          |
| rs2353579  | rs742487   | 0.511                 | 0.061                 | 8.83E-04                          | 3.14E-04                          | 7.85E-05                  | 1.53E-01                  | 3.60E-04                          |
| rs6852986  | rs17149981 | 0.09                  | 0.032                 | 9.10E-05                          | 1.82E-05                          | 8.90E-05                  | 1.51E-01                  | 3.80E-02                          |
| rs10510786 | rs7809551  | 0.395                 | 0.209                 | 3.28E-04                          | 6.33E-04                          | 8.95E-05                  | 4.38E-01                  | 2.59E-02                          |
| rs4696618  | rs4767329  | 0.219                 | 0.473                 | 2.27E-04                          | 3.50E-04                          | 9.31E-05                  | --                        | --                                |
| rs12674115 | rs10492761 | 0.19                  | 0.461                 | 5.36E-04                          | 7.59E-04                          | 1.12E-04                  | 7.43E-01                  | 1.01E-02                          |
| rs969368   | rs8087353  | 0.074                 | 0.268                 | 5.75E-04                          | 5.69E-04                          | 1.13E-04                  | 6.85E-01                  | 2.51E-02                          |
| rs17360414 | rs1909218  | 0.056                 | 0.153                 | 6.44E-04                          | 9.40E-04                          | 1.14E-04                  | 3.09E-01                  | 4.02E-03                          |
| rs2324982  | rs1870146  | 0.039                 | 0.11                  | 7.21E-04                          | 5.14E-04                          | 1.15E-04                  | 9.72E-01                  | 1.33E-01                          |
| rs3765857  | rs477262   | 0.456                 | 0.307                 | 4.34E-05                          | 9.88E-04                          | 1.23E-04                  | --                        | --                                |
| rs10239003 | rs7161989  | 0.372                 | 0.262                 | 5.33E-04                          | 3.01E-04                          | 1.26E-04                  | 3.77E-01                  | 4.11E-02                          |
| rs10510786 | rs10050400 | 0.395                 | 0.028                 | 3.28E-04                          | 9.64E-04                          | 1.29E-04                  | 3.19E-01                  | 8.37E-04                          |
| rs8011392  | rs3790076  | 0.2                   | 0.439                 | 5.83E-04                          | 7.89E-04                          | 1.35E-04                  | 8.28E-01                  | 1.82E-02                          |
| rs9990208  | rs1570647  | 0.091                 | 0.119                 | 1.20E-04                          | 9.04E-04                          | 1.39E-04                  | 2.28E-01                  | 1.24E-01                          |
| rs17350838 | rs7193186  | 0.221                 | 0.076                 | 3.68E-04                          | 7.38E-04                          | 1.47E-04                  | 4.83E-01                  | 3.92E-03                          |
| rs2295514  | rs442965   | 0.12                  | 0.209                 | 8.45E-04                          | 5.44E-04                          | 1.48E-04                  | 3.46E-01                  | 3.75E-02                          |
| rs2930382  | rs17089546 | 0.346                 | 0.246                 | 3.40E-04                          | 5.17E-06                          | 1.53E-04                  | 8.92E-01                  | 2.44E-02                          |
| rs606452   | rs289742   | 0.146                 | 0.148                 | 8.25E-04                          | 5.87E-05                          | 1.76E-04                  | 3.43E-01                  | 3.83E-03                          |
| rs7830977  | rs5882     | 0.254                 | 0.286                 | 5.36E-04                          | 3.10E-04                          | 1.77E-04                  | --                        | --                                |
| rs12529747 | rs17735525 | 0.176                 | 0.08                  | 2.71E-04                          | 8.33E-04                          | 1.78E-04                  | 3.01E-01                  | 5.53E-02                          |
| rs12672541 | rs12626156 | 0.408                 | 0.008                 | 9.54E-04                          | 2.50E-04                          | 1.82E-04                  | 9.98E-01                  | -- <sup>b</sup>                   |
| rs6852986  | rs4767329  | 0.09                  | 0.473                 | 9.10E-05                          | 3.50E-04                          | 1.86E-04                  | 6.00E-01                  | 1.11E-01                          |
| rs12497236 | rs12626156 | 0.099                 | 0.008                 | 7.49E-04                          | 2.50E-04                          | 1.89E-04                  | --                        | --                                |
| rs6578453  | rs1345117  | 0.061                 | 0.43                  | 2.57E-05                          | 2.86E-05                          | 1.97E-04                  | 3.69E-01                  | 3.61E-03                          |
| rs1407837  | rs17619273 | 0.229                 | 0.031                 | 5.86E-05                          | 6.40E-04                          | 2.00E-04                  | 8.22E-01                  | 2.50E-02                          |
| rs4233508  | rs10239003 | 0.302                 | 0.372                 | 7.57E-04                          | 5.33E-04                          | 2.04E-04                  | 2.93E-02                  | 1.63E-01                          |
| rs12120351 | rs9316444  | 0.011                 | 0.275                 | 7.73E-04                          | 6.36E-04                          | 2.08E-04                  | 6.75E-01                  | 4.79E-02                          |
| rs1486563  | rs11656173 | 0.505                 | 0.4                   | 8.37E-04                          | 6.88E-04                          | 2.08E-04                  | 5.24E-01                  | 2.65E-02                          |
| rs7138263  | rs11179868 | 0.23                  | 0.101                 | 6.90E-04                          | 8.29E-04                          | 2.09E-04                  | 5.43E-01                  | 7.99E-03                          |
| rs1839022  | rs9577914  | 0.18                  | 0.309                 | 4.74E-04                          | 9.80E-04                          | 2.17E-04                  | --                        | --                                |
| rs234029   | rs10811650 | 0.041                 | 0.514                 | 5.86E-04                          | 7.72E-07                          | 2.20E-04                  | 3.39E-01                  | 4.46E-03                          |
| rs7550312  | rs974819   | 0.008                 | 0.292                 | 7.54E-04                          | 7.01E-04                          | 2.22E-04                  | --                        | --                                |
| rs12211268 | rs7927116  | 0.463                 | 0.007                 | 9.60E-04                          | 1.14E-04                          | 2.33E-04                  | 7.56E-01                  | 2.18E-02                          |
| rs7518519  | rs467634   | 0.291                 | 0.137                 | 8.63E-04                          | 9.95E-04                          | 2.43E-04                  | 2.47E-01                  | 1.55E-04                          |
| rs2182861  | rs11660701 | 0.398                 | 0.423                 | 6.50E-04                          | 5.23E-04                          | 2.49E-04                  | 9.35E-01                  | 7.96E-03                          |
| rs4298013  | rs12529747 | 0.448                 | 0.176                 | 4.72E-04                          | 2.71E-04                          | 2.72E-04                  | 2.42E-02                  | 1.93E-03                          |
| rs4696618  | rs17470826 | 0.219                 | 0.042                 | 2.27E-04                          | 9.00E-04                          | 2.72E-04                  | --                        | --                                |
| rs925669   | rs11656173 | 0.425                 | 0.4                   | 1.91E-04                          | 6.88E-04                          | 2.76E-04                  | 1.27E-01                  | 1.66E-01                          |
| rs12529747 | rs1788823  | 0.176                 | 0.365                 | 2.71E-04                          | 6.94E-04                          | 2.77E-04                  | 2.09E-01                  | 6.90E-04                          |
| rs4241895  | rs10827949 | 0.21                  | 0.257                 | 9.59E-04                          | 4.07E-04                          | 2.85E-04                  | 6.54E-01                  | 2.51E-02                          |
| rs12511169 | rs289742   | 0.365                 | 0.148                 | 1.36E-04                          | 5.87E-05                          | 2.85E-04                  | 4.69E-01                  | 4.75E-02                          |
| rs17202030 | rs16956631 | 0.444                 | 0.043                 | 8.05E-04                          | 6.51E-04                          | 2.86E-04                  | 6.02E-01                  | 3.01E-02                          |
| rs17167126 | rs11212823 | 0.04                  | 0.147                 | 4.91E-05                          | 7.97E-04                          | 2.87E-04                  | 5.83E-01                  | 2.62E-02                          |
| rs232540   | rs3020839  | 0.376                 | 0.437                 | 4.05E-04                          | 7.95E-04                          | 2.90E-04                  | 7.84E-01                  | 3.06E-02                          |

<sup>a</sup> Minor allele frequency in MIGen controls

<sup>b</sup> Data were available for both SNPs in this pair, but the meta-analysis model returned an unreliable result due to extreme variance for some of the interaction terms

<sup>c</sup> p-value for association with MI in the MIGen study (adjusted for age, sex and IBS principal components; additive genetic model)

### Analysis 3b

| SNP1       | SNP2       | MAF SNP1 <sup>a</sup> | MAF SNP2 <sup>a</sup> | p-value for MI, SNP1 <sup>c</sup> | p-value for MI, SNP2 <sup>c</sup> | MIGen interaction p-value | WTCCC interaction p-value | Meta-analysis interaction p-value |
|------------|------------|-----------------------|-----------------------|-----------------------------------|-----------------------------------|---------------------------|---------------------------|-----------------------------------|
| rs194243   | rs4589969  | 0.285                 | 0.231                 | 3.97E-03                          | 7.75E-03                          | 5.51E-08                  | 9.44E-02                  | 4.78E-05                          |
| rs2844477  | rs12684383 | 0.402                 | 0.151                 | 7.17E-03                          | 2.02E-03                          | 1.31E-07                  | 6.25E-01                  | 2.13E-03                          |
| rs10496796 | rs7660421  | 0.169                 | 0.099                 | 3.22E-03                          | 9.55E-03                          | 2.56E-07                  | --                        | --                                |
| rs6972638  | rs7211960  | 0.198                 | 0.235                 | 1.91E-03                          | 1.15E-03                          | 3.38E-07                  | 6.01E-02                  | 7.01E-07                          |
| rs1414648  | rs2203943  | 0.014                 | 0.407                 | 9.19E-03                          | 4.20E-03                          | 3.66E-07                  | 3.50E-01                  | 9.36E-03                          |
| rs6945902  | rs7232613  | 0.221                 | 0.005                 | 6.26E-03                          | 7.04E-03                          | 3.98E-07                  | 7.94E-02                  | 3.83E-05                          |
| rs494620   | rs12684383 | 0.493                 | 0.151                 | 1.00E-02                          | 2.02E-03                          | 4.57E-07                  | 3.22E-01                  | 3.39E-03                          |
| rs9458301  | rs10237218 | 0.451                 | 0.414                 | 5.71E-03                          | 8.30E-03                          | 5.44E-07                  | --                        | --                                |
| rs2290853  | rs6754251  | 0.011                 | 0.264                 | 8.06E-03                          | 5.93E-03                          | 5.78E-07                  | 4.81E-01                  | 1.20E-01                          |
| rs7603414  | rs2995214  | 0.042                 | 0.219                 | 9.80E-03                          | 5.77E-03                          | 6.99E-07                  | --                        | --                                |
| rs2569248  | rs11148656 | 0.436                 | 0.152                 | 3.08E-03                          | 8.56E-03                          | 8.10E-07                  | 1.70E-01                  | 6.47E-05                          |
| rs11209322 | rs39387    | 0.43                  | 0.435                 | 9.49E-03                          | 2.55E-03                          | 8.63E-07                  | 7.83E-01                  | 7.64E-03                          |
| rs11540586 | rs11760323 | 0.327                 | 0.461                 | 7.64E-03                          | 6.07E-03                          | 8.98E-07                  | 8.86E-01                  | 1.41E-02                          |
| rs7009235  | rs12460041 | 0.427                 | 0.062                 | 5.82E-03                          | 7.50E-03                          | 7.50E-07                  | 9.18E-07                  | 1.20E-01                          |
| rs884799   | rs12155347 | 0.123                 | 0.024                 | 5.30E-03                          | 7.14E-03                          | 1.06E-06                  | 7.12E-01                  | 1.77E-03                          |
| rs6796681  | rs10520025 | 0.1                   | 0.153                 | 7.81E-03                          | 3.40E-03                          | 1.10E-06                  | 5.22E-01                  | 5.89E-03                          |
| rs767664   | rs11914212 | 0.247                 | 0.107                 | 7.57E-03                          | 4.42E-03                          | 1.13E-06                  | 4.84E-01                  | 1.01E-03                          |
| rs12134558 | rs1001415  | 0.022                 | 0.094                 | 8.88E-03                          | 3.09E-03                          | 1.17E-06                  | 1.80E-01                  | 9.85E-04                          |
| rs6599272  | rs9341904  | 0.117                 | 0.485                 | 5.69E-03                          | 4.20E-03                          | 1.20E-06                  | 9.24E-01                  | 2.82E-03                          |
| rs7206390  | rs1704497  | 0.163                 | 0.422                 | 4.18E-03                          | 3.24E-03                          | 1.24E-06                  | 7.61E-01                  | 7.69E-04                          |
| rs12636662 | rs9949270  | 0.365                 | 0.022                 | 7.42E-03                          | 2.09E-03                          | 1.27E-06                  | 3.46E-01                  | 6.35E-03                          |
| rs11675475 | rs4946000  | 0.476                 | 0.013                 | 4.63E-03                          | 1.21E-03                          | 1.28E-06                  | 7.19E-01                  | 4.84E-02                          |
| rs756465   | rs11595511 | 0.298                 | 0.015                 | 8.68E-03                          | 4.86E-03                          | 1.45E-06                  | 4.18E-01                  | 1.27E-03                          |
| rs11579007 | rs1383389  | 0.403                 | 0.274                 | 7.54E-03                          | 6.47E-03                          | 1.59E-06                  | 4.19E-02                  | 3.68E-05                          |
| rs13151220 | rs2859369  | 0.096                 | 0.091                 | 1.00E-02                          | 6.88E-03                          | 1.62E-06                  | 2.46E-01                  | 1.15E-01                          |
| rs11660396 | rs4945876  | 0.263                 | 0.082                 | 4.59E-03                          | 5.29E-04                          | 1.64E-06                  | 1.32E-01                  | 2.96E-03                          |
| rs4858670  | rs17020483 | 0.334                 | 0.073                 | 3.20E-03                          | 5.84E-03                          | 1.71E-06                  | 2.77E-01                  | 1.78E-03                          |
| rs13257940 | rs6867011  | 0.048                 | 0.202                 | 8.35E-03                          | 6.46E-04                          | 1.74E-06                  | 7.29E-01                  | 1.95E-03                          |
| rs10811032 | rs10796850 | 0.091                 | 0.33                  | 1.64E-03                          | 8.21E-03                          | 1.75E-06                  | --                        | --                                |
| rs4619848  | rs12249208 | 0.477                 | 0.028                 | 7.73E-03                          | 3.25E-03                          | 1.76E-06                  | 9.69E-02                  | 4.19E-05                          |
| rs17045713 | rs12457257 | 0.126                 | 0.324                 | 8.59E-03                          | 8.29E-03                          | 1.77E-06                  | 7.26E-01                  | 5.56E-03                          |
| rs12052288 | rs4696822  | 0.122                 | 0.244                 | 8.49E-03                          | 6.91E-03                          | 1.79E-06                  | 6.39E-01                  | 7.18E-03                          |
| rs7558386  | rs212046   | 0.379                 | 0.171                 | 1.00E-02                          | 9.25E-03                          | 1.87E-06                  | 1.42E-01                  | 1.65E-02                          |
| rs12995732 | rs16881257 | 0.074                 | 0.08                  | 2.70E-03                          | 9.73E-03                          | 1.94E-06                  | 1.35E-01                  | 4.06E-03                          |
| rs12732279 | rs2007324  | 0.397                 | 0.439                 | 7.34E-03                          | 5.43E-03                          | 1.96E-06                  | 1.06E-01                  | 1.03E-02                          |
| rs2258180  | rs4667972  | 0.485                 | 0.244                 | 5.05E-03                          | 9.74E-04                          | 2.00E-06                  | 2.27E-01                  | 1.19E-02                          |
| rs1479027  | rs3115512  | 0.115                 | 0.142                 | 6.49E-03                          | 9.90E-03                          | 2.08E-06                  | 6.93E-01                  | 2.33E-03                          |
| rs41561    | rs11703137 | 0.027                 | 0.153                 | 6.30E-03                          | 8.22E-04                          | 2.12E-06                  | 3.50E-01                  | 1.55E-01                          |
| rs12244105 | rs12277517 | 0.114                 | 0.027                 | 5.04E-03                          | 1.28E-03                          | 2.23E-06                  | 6.30E-02                  | 1.34E-01                          |
| rs243069   | rs4734582  | 0.36                  | 0.144                 | 7.54E-03                          | 6.79E-03                          | 2.25E-06                  | 4.42E-01                  | 3.38E-02                          |
| rs6557475  | rs4976349  | 0.107                 | 0.046                 | 9.01E-03                          | 3.70E-04                          | 2.26E-06                  | 8.00E-01                  | 5.45E-02                          |
| rs643064   | rs4872179  | 0.072                 | 0.452                 | 3.11E-03                          | 4.86E-04                          | 2.33E-06                  | 3.30E-01                  | 3.42E-03                          |
| rs4658345  | rs4459626  | 0.019                 | 0.215                 | 8.41E-03                          | 3.97E-03                          | 2.35E-06                  | 3.30E-01                  | 6.82E-03                          |
| rs138400   | rs5747997  | 0.19                  | 0.485                 | 8.87E-03                          | 5.00E-04                          | 2.37E-06                  | --                        | --                                |
| rs227723   | rs2058318  | 0.284                 | 0.382                 | 7.28E-03                          | 5.59E-04                          | 2.56E-06                  | 5.03E-01                  | 7.64E-02                          |
| rs7350481  | rs7276176  | 0.052                 | 0.506                 | 3.22E-03                          | 8.97E-03                          | 2.64E-06                  | 5.55E-01                  | 1.19E-02                          |
| rs17151028 | rs10898329 | 0.32                  | 0.361                 | 4.21E-03                          | 1.90E-03                          | 2.79E-06                  | 4.04E-01                  | 3.52E-04                          |
| rs3971872  | rs3788437  | 0.046                 | 0.167                 | 8.38E-03                          | 3.14E-03                          | 2.91E-06                  | 4.51E-01                  | 1.67E-02                          |
| rs867434   | rs2302984  | 0.191                 | 0.103                 | 6.86E-03                          | 7.23E-03                          | 3.12E-06                  | 1.15E-02                  | 1.26E-03                          |
| rs13008578 | rs16951125 | 0.164                 | 0.09                  | 4.00E-03                          | 3.19E-03                          | 3.15E-06                  | 7.11E-02                  | 1.33E-02                          |
| rs1864933  | rs11641045 | 0.493                 | 0.104                 | 6.52E-03                          | 2.26E-03                          | 3.23E-06                  | 6.56E-01                  | 1.32E-03                          |
| rs7176821  | rs1865093  | 0.086                 | 0.093                 | 6.79E-03                          | 4.28E-03                          | 3.37E-06                  | 8.51E-01                  | 8.46E-04                          |
| rs1421596  | rs17677649 | 0.15                  | 0.165                 | 4.22E-03                          | 9.65E-03                          | 3.47E-06                  | 4.44E-01                  | 5.15E-04                          |
| rs3733471  | rs6534832  | 0.218                 | 0.352                 | 7.50E-03                          | 7.42E-03                          | 3.48E-06                  | 9.89E-01                  | 1.51E-02                          |
| rs7560239  | rs6446762  | 0.421                 | 0.019                 | 4.36E-03                          | 7.68E-03                          | 3.49E-06                  | 5.09E-01                  | 2.95E-02                          |

<sup>a</sup> Minor allele frequency in MIGen controls

<sup>b</sup> Data were available for both SNPs in this pair, but the meta-analysis model returned an unreliable result due to extreme variance in for some of the interaction terms

<sup>c</sup> p-value for association with MI in the MIGen study (adjusted for age, sex and IBS principal components; additive genetic model)

**Table 3.** Power computation.

Effect sizes ( $\beta^{0.8}$ ) for pairs of SNPs with MAFs between 0.02 and 0.5, under a additive  $\times$  additive interaction model (results for other models not shown). '--' denotes instances where the effect size could not be calculated for any of the SNP pairs sampled because of the low frequency of the double rare homozygote. See S3.6 for details of computation and S.F4 for a graphical representation of these results, and also for dominant  $\times$  dominant and recessive  $\times$  recessive interaction models.

**ANALYSIS 1. Additive  $\times$  additive model**

| MAF         | (0.02,0.04] | (0.04,0.06] | (0.06,0.08] | (0.08,0.1] | (0.1,0.12] | (0.12,0.14] | (0.14,0.16] | (0.16,0.18] | (0.18,0.2] | (0.2,0.22] | (0.22,0.24] | (0.24,0.26] | (0.26,0.28] | (0.28,0.3] | (0.3,0.32] | (0.32,0.34] | (0.34,0.36] | (0.36,0.38] | (0.38,0.4] | (0.4,0.42] | (0.42,0.44] | (0.44,0.46] | (0.46,0.48] | (0.48,0.5] |
|-------------|-------------|-------------|-------------|------------|------------|-------------|-------------|-------------|------------|------------|-------------|-------------|-------------|------------|------------|-------------|-------------|-------------|------------|------------|-------------|-------------|-------------|------------|
| (0.02,0.04] | --          | --          | --          | --         | --         | --          | --          | --          | --         | --         | --          | --          | --          | --         | --         | --          | --          | --          | --         | --         | --          | --          | --          | --         |
| (0.04,0.06] | --          | --          | --          | --         | --         | --          | --          | --          | --         | --         | --          | --          | --          | --         | --         | 2.12        | --          | --          | --         | --         | --          | --          | 2.03        | --         |
| (0.06,0.08] | --          | --          | --          | --         | --         | --          | --          | --          | --         | --         | --          | --          | --          | --         | --         | --          | 1.89        | --          | 1.90       | 1.89       | --          | 1.89        | 1.87        | 1.84       |
| (0.08,0.1]  | --          | --          | --          | --         | 2.57       | --          | --          | --          | --         | --         | --          | --          | --          | --         | 1.86       | --          | --          | --          | --         | --         | 1.79        | 1.79        | 1.80        | 1.77       |
| (0.1,0.12]  | --          | --          | --          | 2.57       | --         | --          | --          | --          | --         | --         | --          | --          | --          | --         | --         | --          | 1.74        | --          | 1.72       | 1.71       | 1.72        | --          | 1.72        | 1.70       |
| (0.12,0.14] | --          | --          | --          | --         | --         | --          | --          | --          | --         | 1.76       | --          | 1.72        | 1.70        | 1.66       | 1.66       | 1.65        | 1.64        | 1.64        | 1.62       | 1.61       | 1.62        | 1.61        | 1.61        | 1.62       |
| (0.14,0.16] | --          | --          | --          | --         | --         | --          | 1.83        | --          | 1.76       | --         | 1.68        | 1.68        | 1.65        | 1.63       | 1.60       | 1.59        | 1.58        | 1.56        | 1.56       | 1.55       | 1.55        | 1.53        | 1.53        | 1.54       |
| (0.16,0.18] | --          | --          | --          | --         | --         | --          | 1.83        | --          | --         | 1.67       | 1.64        | 1.63        | 1.60        | 1.59       | 1.58       | 1.58        | 1.56        | 1.56        | 1.55       | 1.55       | 1.53        | 1.53        | 1.53        | 1.54       |
| (0.18,0.2]  | --          | --          | --          | --         | --         | --          | --          | 1.70        | 1.66       | 1.65       | 1.61        | 1.60        | 1.58        | 1.56       | 1.55       | 1.55        | 1.54        | 1.53        | 1.53       | 1.52       | 1.52        | 1.52        | 1.52        | 1.52       |
| (0.2,0.22]  | --          | --          | --          | --         | --         | 1.76        | --          | 1.66        | 1.63       | 1.61       | 1.58        | 1.58        | 1.56        | 1.54       | 1.53       | 1.52        | 1.51        | 1.52        | 1.50       | 1.49       | 1.48        | 1.47        | 1.48        | 1.47       |
| (0.22,0.24] | --          | --          | --          | --         | 1.76       | --          | 1.67        | 1.65        | 1.61       | 1.59       | 1.56        | 1.55        | 1.55        | 1.52       | 1.51       | 1.51        | 1.50        | 1.49        | 1.48       | 1.47       | 1.48        | 1.48        | 1.48        | 1.47       |
| (0.24,0.26] | --          | --          | --          | --         | --         | 1.68        | 1.64        | 1.61        | 1.58       | 1.56       | 1.54        | 1.52        | 1.52        | 1.50       | 1.48       | 1.48        | 1.47        | 1.46        | 1.46       | 1.46       | 1.46        | 1.45        | 1.46        | 1.46       |
| (0.26,0.28] | --          | --          | --          | --         | 1.72       | 1.68        | 1.63        | 1.60        | 1.58       | 1.55       | 1.52        | 1.51        | 1.51        | 1.48       | 1.47       | 1.47        | 1.46        | 1.46        | 1.45       | 1.45       | 1.44        | 1.45        | 1.44        | 1.44       |
| (0.28,0.3]  | --          | --          | --          | --         | 1.70       | 1.65        | 1.60        | 1.58        | 1.56       | 1.55       | 1.52        | 1.51        | 1.49        | 1.47       | 1.47       | 1.46        | 1.45        | 1.45        | 1.43       | 1.43       | 1.43        | 1.43        | 1.42        | 1.44       |
| (0.3,0.32]  | --          | --          | 1.86        | --         | 1.66       | 1.63        | 1.59        | 1.56        | 1.54       | 1.52       | 1.50        | 1.48        | 1.47        | 1.46       | 1.45       | 1.45        | 1.43        | 1.43        | 1.43       | 1.43       | 1.42        | 1.42        | 1.42        | 1.42       |
| (0.32,0.34] | --          | 2.12        | --          | --         | 1.66       | 1.62        | 1.58        | 1.55        | 1.53       | 1.51       | 1.48        | 1.47        | 1.47        | 1.45       | 1.44       | 1.44        | 1.43        | 1.42        | 1.42       | 1.42       | 1.41        | 1.42        | 1.42        | 1.41       |
| (0.34,0.36] | --          | --          | 1.89        | --         | 1.74       | 1.65        | 1.61        | 1.58        | 1.55       | 1.52       | 1.51        | 1.48        | 1.47        | 1.46       | 1.45       | 1.44        | 1.42        | 1.42        | 1.42       | 1.41       | 1.41        | 1.41        | 1.40        | 1.40       |
| (0.36,0.38] | --          | --          | --          | --         | --         | 1.64        | 1.61        | 1.56        | 1.54       | 1.51       | 1.50        | 1.47        | 1.46        | 1.46       | 1.43       | 1.43        | 1.42        | 1.42        | 1.41       | 1.41       | 1.41        | 1.40        | 1.40        | 1.40       |
| (0.38,0.4]  | --          | --          | 1.90        | --         | 1.72       | 1.64        | 1.60        | 1.56        | 1.53       | 1.52       | 1.49        | 1.46        | 1.46        | 1.45       | 1.43       | 1.42        | 1.42        | 1.41        | 1.41       | 1.41       | 1.40        | 1.40        | 1.39        | 1.40       |
| (0.4,0.42]  | --          | --          | 1.89        | --         | 1.71       | 1.62        | 1.59        | 1.55        | 1.53       | 1.50       | 1.48        | 1.46        | 1.45        | 1.45       | 1.43       | 1.42        | 1.41        | 1.41        | 1.41       | 1.40       | 1.39        | 1.39        | 1.39        | 1.39       |
| (0.42,0.44] | --          | --          | --          | 1.79       | 1.72       | 1.61        | 1.59        | 1.55        | 1.52       | 1.50       | 1.47        | 1.46        | 1.45        | 1.44       | 1.43       | 1.41        | 1.41        | 1.40        | 1.40       | 1.39       | 1.39        | 1.39        | 1.38        | 1.38       |
| (0.44,0.46] | --          | --          | 1.89        | 1.79       | --         | 1.62        | 1.58        | 1.53        | 1.52       | 1.50       | 1.48        | 1.45        | 1.44        | 1.44       | 1.42       | 1.42        | 1.41        | 1.40        | 1.40       | 1.39       | 1.39        | 1.39        | 1.39        | 1.39       |
| (0.46,0.48] | --          | 2.03        | 1.87        | 1.80       | 1.72       | 1.61        | 1.59        | 1.53        | 1.52       | 1.50       | 1.48        | 1.46        | 1.45        | 1.43       | 1.42       | 1.42        | 1.40        | 1.40        | 1.39       | 1.39       | 1.38        | 1.39        | 1.39        | 1.39       |
| (0.48,0.5]  | --          | --          | 1.84        | 1.77       | 1.70       | 1.62        | 1.57        | 1.54        | 1.52       | 1.48       | 1.47        | 1.46        | 1.44        | 1.44       | 1.42       | 1.41        | 1.40        | 1.40        | 1.40       | 1.39       | 1.38        | 1.39        | 1.39        | 1.38       |

**ANALYSIS 2. Additive × additive model**

| MAF         | (0.02,0.04] | (0.04,0.06] | (0.06,0.08] | (0.08,0.1] | (0.1,0.12] | (0.12,0.14] | (0.14,0.16] | (0.16,0.18] | (0.18,0.2] | (0.2,0.22] | (0.22,0.24] | (0.24,0.26] | (0.26,0.28] | (0.28,0.3] | (0.3,0.32] | (0.32,0.34] | (0.34,0.36] | (0.36,0.38] | (0.38,0.4] | (0.4,0.42] | (0.42,0.44] | (0.44,0.46] | (0.46,0.48] | (0.48,0.5] |      |
|-------------|-------------|-------------|-------------|------------|------------|-------------|-------------|-------------|------------|------------|-------------|-------------|-------------|------------|------------|-------------|-------------|-------------|------------|------------|-------------|-------------|-------------|------------|------|
| (0.02,0.04] | --          | --          | --          | --         | --         | --          | --          | --          | --         | --         | --          | --          | --          | --         | --         | --          | --          | --          | --         | --         | --          | --          | --          | --         |      |
| (0.04,0.06] | --          | --          | --          | --         | --         | --          | --          | --          | --         | --         | --          | --          | --          | --         | --         | --          | --          | --          | --         | --         | --          | --          | --          | --         |      |
| (0.06,0.08] | --          | --          | --          | --         | --         | --          | --          | --          | --         | --         | --          | --          | --          | --         | --         | --          | --          | --          | --         | --         | --          | --          | --          | --         |      |
| (0.08,0.1]  | --          | --          | --          | --         | --         | --          | --          | --          | --         | --         | --          | --          | --          | --         | --         | --          | --          | --          | --         | --         | --          | --          | --          | 1.91       |      |
| (0.1,0.12]  | --          | --          | --          | --         | --         | --          | --          | --          | --         | --         | --          | --          | --          | --         | --         | --          | --          | --          | --         | --         | --          | 1.83        | 1.84        | 1.83       | --   |
| (0.12,0.14] | --          | --          | --          | --         | --         | --          | --          | --          | --         | --         | --          | --          | --          | --         | --         | --          | --          | --          | 1.75       | 1.74       | --          | 1.74        | 1.74        | 1.74       | 1.73 |
| (0.14,0.16] | --          | --          | --          | --         | --         | --          | --          | --          | --         | --         | --          | --          | 1.75        | 1.73       | --         | 1.70        | 1.69        | 1.67        | 1.68       | 1.68       | 1.68        | 1.68        | 1.68        | 1.61       | 1.66 |
| (0.16,0.18] | --          | --          | --          | --         | --         | --          | --          | --          | 1.85       | --         | 1.72        | 1.75        | 1.72        | 1.69       | 1.68       | 1.67        | 1.65        | 1.62        | 1.64       | 1.62       | 1.62        | 1.62        | 1.62        | 1.61       | 1.60 |
| (0.18,0.2]  | --          | --          | --          | --         | --         | --          | --          | --          | 1.76       | --         | 1.71        | 1.67        | 1.65        | 1.64       | 1.63       | 1.61        | 1.60        | 1.58        | 1.59       | 1.58       | 1.58        | 1.58        | 1.57        | 1.57       | 1.57 |
| (0.2,0.22]  | --          | --          | --          | --         | --         | --          | 1.85        | 1.76        | --         | 1.70       | 1.68        | 1.66        | 1.63        | 1.62       | 1.61       | 1.59        | 1.59        | 1.57        | 1.57       | 1.57       | 1.56        | 1.56        | 1.56        | 1.56       | 1.54 |
| (0.22,0.24] | --          | --          | --          | --         | --         | --          | --          | --          | 1.70       | --         | 1.65        | 1.63        | 1.60        | 1.60       | 1.56       | 1.56        | 1.55        | 1.55        | 1.54       | 1.53       | 1.53        | 1.53        | 1.52        | 1.51       | 1.51 |
| (0.24,0.26] | --          | --          | --          | --         | --         | --          | 1.72        | 1.71        | 1.68       | 1.65       | 1.63        | 1.61        | 1.57        | 1.56       | 1.55       | 1.54        | 1.52        | 1.51        | 1.49       | 1.49       | 1.47        | 1.47        | 1.45        | 1.44       | 1.44 |
| (0.26,0.28] | --          | --          | --          | --         | --         | --          | 1.75        | 1.67        | 1.66       | 1.63       | 1.61        | 1.58        | 1.55        | 1.54       | 1.52       | 1.51        | 1.51        | 1.49        | 1.49       | 1.49       | 1.48        | 1.48        | 1.48        | 1.48       | 1.47 |
| (0.28,0.3]  | --          | --          | --          | --         | --         | 1.75        | 1.72        | 1.65        | 1.63       | 1.60       | 1.57        | 1.55        | 1.55        | 1.53       | 1.51       | 1.51        | 1.49        | 1.49        | 1.49       | 1.48       | 1.48        | 1.48        | 1.48        | 1.48       | 1.47 |
| (0.3,0.32]  | --          | --          | --          | --         | --         | 1.73        | 1.69        | 1.64        | 1.62       | 1.60       | 1.56        | 1.54        | 1.53        | 1.52       | 1.50       | 1.49        | 1.49        | 1.47        | 1.47       | 1.47       | 1.47        | 1.45        | 1.46        | 1.46       | 1.46 |
| (0.32,0.34] | --          | --          | --          | --         | --         | --          | 1.68        | 1.63        | 1.61       | 1.56       | 1.55        | 1.52        | 1.51        | 1.50       | 1.48       | 1.48        | 1.47        | 1.47        | 1.46       | 1.46       | 1.45        | 1.44        | 1.44        | 1.45       | 1.45 |
| (0.34,0.36] | --          | --          | --          | --         | --         | 1.70        | 1.67        | 1.61        | 1.59       | 1.56       | 1.54        | 1.51        | 1.51        | 1.49       | 1.48       | 1.46        | 1.44        | 1.46        | 1.44       | 1.44       | 1.43        | 1.43        | 1.44        | 1.44       | 1.44 |
| (0.36,0.38] | --          | --          | --          | --         | --         | 1.69        | 1.65        | 1.60        | 1.59       | 1.55       | 1.52        | 1.51        | 1.49        | 1.49       | 1.47       | 1.44        | 1.46        | 1.45        | 1.45       | 1.44       | 1.44        | 1.44        | 1.44        | 1.44       | 1.43 |
| (0.38,0.4]  | --          | --          | --          | --         | 1.75       | 1.67        | 1.62        | 1.60        | 1.57       | 1.55       | 1.53        | 1.50        | 1.49        | 1.47       | 1.47       | 1.46        | 1.45        | 1.44        | 1.43       | 1.43       | 1.43        | 1.42        | 1.42        | 1.42       | 1.42 |
| (0.4,0.42]  | --          | --          | --          | --         | 1.74       | 1.68        | 1.64        | 1.58        | 1.57       | 1.54       | 1.51        | 1.49        | 1.49        | 1.47       | 1.46       | 1.44        | 1.45        | 1.43        | 1.43       | 1.43       | 1.43        | 1.40        | 1.42        | 1.42       | 1.41 |
| (0.42,0.44] | --          | --          | --          | 1.83       | --         | 1.68        | 1.62        | 1.59        | 1.56       | 1.53       | 1.51        | 1.50        | 1.48        | 1.47       | 1.46       | 1.45        | 1.44        | 1.43        | 1.43       | 1.42       | 1.42        | 1.42        | 1.42        | 1.41       | 1.41 |
| (0.44,0.46] | --          | --          | --          | 1.84       | 1.74       | 1.68        | 1.62        | 1.58        | 1.56       | 1.53       | 1.50        | 1.48        | 1.48        | 1.45       | 1.45       | 1.43        | 1.44        | 1.42        | 1.40       | 1.42       | 1.42        | 1.40        | 1.41        | 1.41       | 1.41 |
| (0.46,0.48] | --          | --          | --          | 1.83       | 1.74       | 1.61        | 1.61        | 1.57        | 1.56       | 1.52       | 1.50        | 1.49        | 1.48        | 1.46       | 1.44       | 1.44        | 1.44        | 1.42        | 1.42       | 1.42       | 1.42        | 1.41        | 1.41        | 1.41       | 1.41 |
| (0.48,0.5]  | --          | --          | 1.91        | --         | 1.73       | 1.66        | 1.60        | 1.57        | 1.54       | 1.51       | 1.51        | 1.48        | 1.47        | 1.46       | 1.45       | 1.44        | 1.43        | 1.42        | 1.42       | 1.42       | 1.41        | 1.41        | 1.41        | 1.41       | 1.41 |

**ANALYSIS 3a (marginal SNPs  $p < 10^{-3}$ ). Additive × additive model**

| MAF         | (0.02,0.04] | (0.04,0.06] | (0.06,0.08] | (0.08,0.1] | (0.1,0.12] | (0.12,0.14] | (0.14,0.16] | (0.16,0.18] | (0.18,0.2] | (0.2,0.22] | (0.22,0.24] | (0.24,0.26] | (0.26,0.28] | (0.28,0.3] | (0.3,0.32] | (0.32,0.34] | (0.34,0.36] | (0.36,0.38] | (0.38,0.4] | (0.4,0.42] | (0.42,0.44] | (0.44,0.46] | (0.46,0.48] | (0.48,0.5] |      |
|-------------|-------------|-------------|-------------|------------|------------|-------------|-------------|-------------|------------|------------|-------------|-------------|-------------|------------|------------|-------------|-------------|-------------|------------|------------|-------------|-------------|-------------|------------|------|
| (0.02,0.04] | --          | --          | --          | --         | --         | --          | --          | --          | 5.45       | --         | 4.51        | --          | --          | --         | --         | --          | --          | --          | --         | --         | --          | --          | --          | --         | --   |
| (0.04,0.06] | --          | --          | --          | --         | --         | --          | --          | --          | --         | --         | --          | --          | --          | --         | --         | --          | --          | --          | --         | --         | --          | --          | --          | --         | --   |
| (0.06,0.08] | --          | --          | --          | --         | --         | --          | --          | --          | --         | --         | --          | --          | --          | --         | --         | --          | --          | --          | --         | --         | --          | --          | --          | --         | --   |
| (0.08,0.1]  | --          | --          | --          | --         | --         | --          | --          | --          | --         | --         | --          | --          | --          | --         | --         | --          | --          | --          | 1.95       | --         | --          | --          | --          | --         | --   |
| (0.1,0.12]  | --          | --          | --          | --         | --         | --          | --          | --          | --         | --         | --          | --          | --          | --         | --         | 1.89        | --          | --          | 1.84       | 1.80       | 1.83        | 1.80        | 1.84        | 1.84       | 1.84 |
| (0.12,0.14] | --          | --          | --          | --         | --         | --          | --          | --          | --         | --         | --          | 1.86        | --          | --         | 1.81       | 1.70        | 1.75        | 1.76        | --         | 1.73       | 1.72        | 1.72        | 1.70        | 1.70       | 1.70 |
| (0.14,0.16] | --          | --          | --          | --         | --         | --          | --          | --          | --         | --         | --          | --          | 1.77        | 1.75       | --         | --          | 1.69        | 1.69        | 1.68       | 1.67       | 1.66        | 1.67        | 1.68        | 1.68       | 1.68 |
| (0.16,0.18] | --          | --          | --          | --         | --         | --          | --          | 1.83        | --         | 1.76       | --          | 1.72        | --          | 1.65       | 1.63       | 1.64        | 1.64        | 1.64        | 1.63       | 1.59       | 1.61        | 1.60        | 1.60        | 1.60       |      |
| (0.18,0.2]  | --          | --          | --          | --         | --         | --          | --          | 1.82        | 1.77       | 1.76       | 1.69        | 1.69        | 1.67        | 1.64       | 1.62       | 1.62        | 1.60        | 1.59        | 1.58       | 1.59       | 1.58        | 1.57        | 1.57        | 1.57       | 1.57 |
| (0.2,0.22]  | 5.45        | --          | --          | --         | --         | --          | 1.83        | 1.77        | 1.73       | --         | 1.67        | 1.66        | 1.65        | --         | 1.61       | 1.58        | 1.57        | 1.57        | 1.57       | 1.56       | 1.53        | 1.55        | 1.55        | 1.55       |      |
| (0.22,0.24] | --          | --          | --          | --         | --         | --          | --          | 1.76        | --         | 1.67       | 1.64        | 1.62        | 1.62        | 1.60       | 1.57       | 1.56        | 1.54        | 1.55        | 1.54       | 1.53       | 1.53        | 1.53        | 1.53        | 1.52       |      |
| (0.24,0.26] | 4.51        | --          | --          | --         | --         | --          | 1.76        | 1.69        | 1.67       | 1.64       | 1.60        | 1.58        | 1.59        | 1.57       | 1.55       | 1.55        | 1.53        | 1.52        | 1.52       | 1.50       | 1.51        | 1.51        | 1.51        | 1.50       |      |
| (0.26,0.28] | --          | --          | --          | --         | 1.86       | --          | --          | 1.69        | 1.66       | 1.62       | 1.58        | 1.57        | 1.55        | 1.54       | 1.52       | 1.52        | 1.51        | 1.50        | 1.50       | 1.49       | 1.49        | 1.48        | 1.48        | 1.48       |      |
| (0.28,0.3]  | --          | --          | --          | --         | --         | 1.77        | 1.72        | 1.67        | 1.65       | 1.62       | 1.59        | 1.55        | 1.54        | 1.52       | 1.52       | 1.51        | 1.49        | 1.49        | 1.48       | 1.48       | 1.48        | 1.48        | 1.48        | 1.47       | 1.46 |
| (0.3,0.32]  | --          | --          | --          | --         | --         | 1.75        | --          | 1.64        | --         | 1.60       | 1.57        | 1.54        | 1.52        | 1.52       | 1.51       | 1.49        | 1.49        | 1.47        | 1.47       | 1.46       | 1.47        | 1.46        | 1.45        | 1.45       |      |
| (0.32,0.34] | --          | --          | --          | --         | 1.81       | --          | 1.65        | 1.62        | 1.61       | 1.57       | 1.55        | 1.52        | 1.52        | 1.51       | 1.47       | 1.49        | 1.48        | 1.47        | 1.46       | 1.45       | 1.45        | 1.45        | 1.45        | 1.44       |      |
| (0.34,0.36] | --          | --          | --          | 1.89       | 1.70       | --          | 1.63        | 1.62        | 1.58       | 1.56       | 1.55        | 1.52        | 1.47        | 1.49       | 1.49       | 1.46        | 1.47        | 1.46        | 1.45       | 1.44       | 1.44        | 1.43        | 1.43        | 1.43       |      |
| (0.36,0.38] | --          | --          | --          | --         | 1.75       | 1.69        | 1.64        | 1.60        | 1.57       | 1.54       | 1.53        | 1.51        | 1.55        | 1.49       | 1.48       | 1.47        | 1.45        | 1.45        | 1.45       | 1.44       | 1.44        | 1.43        | 1.43        | 1.43       |      |
| (0.38,0.4]  | --          | --          | --          | --         | 1.76       | 1.69        | 1.64        | 1.59        | 1.57       | 1.55       | 1.52        | 1.50        | 1.48        | 1.47       | 1.47       | 1.46        | 1.45        | 1.44        | 1.43       | 1.43       | 1.43        | 1.43        | 1.43        | 1.42       | 1.46 |
| (0.4,0.42]  | --          | --          | 1.95        | 1.84       | --         | 1.68        | 1.64        | 1.58        | 1.57       | 1.54       | 1.52        | 1.50        | 1.48        | 1.47       | 1.46       | 1.45        | 1.45        | 1.43        | 1.43       | 1.43       | 1.43        | 1.43        | 1.42        | 1.42       | 1.42 |
| (0.42,0.44] | --          | --          | --          | 1.80       | 1.73       | 1.67        | 1.63        | 1.59        | 1.56       | 1.53       | 1.50        | 1.49        | 1.48        | 1.46       | 1.45       | 1.45        | 1.44        | 1.43        | 1.43       | 1.42       | 1.38        | 1.41        | 1.41        | 1.41       |      |
| (0.44,0.46] | --          | --          | --          | 1.83       | 1.72       | 1.66        | 1.59        | 1.58        | 1.53       | 1.53       | 1.51        | 1.49        | 1.48        | 1.47       | 1.45       | 1.44        | 1.41        | 1.43        | 1.43       | 1.38       | 1.41        | 1.41        | 1.41        | 1.40       |      |
| (0.46,0.48] | --          | --          | --          | 1.80       | 1.72       | 1.67        | 1.61        | 1.57        | 1.55       | 1.53       | 1.51        | 1.48        | 1.47        | 1.46       | 1.45       | 1.43        | 1.43        | 1.42        | 1.42       | 1.41       | 1.41        | 1.41        | 1.41        | 1.40       | 1.40 |
| (0.48,0.5]  | --          | --          | --          | 1.84       | 1.70       | 1.68        | 1.60        | 1.57        | 1.55       | 1.52       | 1.50        | 1.48        | 1.46        | 1.45       | 1.44       | 1.43        | 1.43        | 1.43        | 1.42       | 1.41       | 1.40        | 1.40        | 1.40        | 1.41       | 1.41 |

**ANALYSIS 3b (marginal SNPs  $p < 10^{-2}$ ). Additive × additive model**

| MAF         | (0.02,0.04] | (0.04,0.06] | (0.06,0.08] | (0.08,0.1] | (0.1,0.12] | (0.12,0.14] | (0.14,0.16] | (0.16,0.18] | (0.18,0.2] | (0.2,0.22] | (0.22,0.24] | (0.24,0.26] | (0.26,0.28] | (0.28,0.3] | (0.3,0.32] | (0.32,0.34] | (0.34,0.36] | (0.36,0.38] | (0.38,0.4] | (0.4,0.42] | (0.42,0.44] | (0.44,0.46] | (0.46,0.48] | (0.48,0.5] |
|-------------|-------------|-------------|-------------|------------|------------|-------------|-------------|-------------|------------|------------|-------------|-------------|-------------|------------|------------|-------------|-------------|-------------|------------|------------|-------------|-------------|-------------|------------|
| (0.02,0.04] | --          | --          | --          | --         | --         | --          | --          | --          | --         | --         | --          | --          | --          | --         | --         | --          | --          | --          | --         | 3.93       | --          | --          | --          | --         |
| (0.04,0.06] | --          | --          | --          | --         | --         | --          | --          | --          | --         | 6.59       | --          | --          | --          | --         | --         | --          | --          | --          | --         | --         | --          | --          | --          | --         |
| (0.06,0.08] | --          | --          | --          | --         | --         | --          | --          | --          | --         | --         | --          | --          | --          | --         | --         | --          | --          | --          | --         | --         | --          | --          | --          | --         |
| (0.08,0.1]  | --          | --          | --          | 2.74       | --         | --          | --          | --          | --         | --         | --          | --          | --          | --         | --         | --          | --          | --          | --         | --         | --          | 2.05        | --          | --         |
| (0.1,0.12]  | --          | --          | --          | --         | --         | --          | --          | --          | --         | --         | --          | --          | --          | 2.03       | --         | --          | --          | 2.03        | 1.96       | 1.99       | 1.97        | 1.99        | 1.97        | 1.96       |
| (0.12,0.14] | --          | --          | --          | --         | --         | --          | --          | --          | --         | --         | --          | --          | --          | --         | 1.91       | 1.85        | 1.90        | 1.92        | 1.89       | 1.87       | --          | 1.82        | 1.86        | 1.84       |
| (0.14,0.16] | --          | --          | --          | --         | --         | --          | --          | --          | --         | --         | --          | --          | --          | --         | 1.83       | 1.85        | 1.84        | 1.74        | 1.78       | 1.80       | 1.79        | 1.77        | 1.73        | 1.81       |
| (0.16,0.18] | --          | --          | --          | --         | --         | --          | --          | --          | --         | --         | --          | --          | 1.86        | 1.84       | --         | 1.77        | 1.69        | 1.75        | 1.74       | 1.73       | 1.74        | 1.71        | 1.71        | 1.72       |
| (0.18,0.2]  | --          | --          | --          | --         | --         | --          | --          | --          | 1.88       | --         | --          | 1.81        | 1.79        | 1.75       | 1.69       | 1.71        | 1.69        | 1.71        | 1.68       | 1.67       | 1.64        | 1.66        | 1.65        | 1.65       |
| (0.2,0.22]  | --          | --          | --          | --         | --         | --          | --          | 1.88        | --         | 1.84       | 1.78        | 1.78        | 1.74        | 1.69       | 1.69       | 1.67        | 1.66        | 1.66        | 1.66       | 1.65       | 1.64        | 1.64        | 1.63        | 1.63       |
| (0.22,0.24] | --          | 6.59        | --          | --         | --         | --          | --          | --          | 1.84       | 1.78       | 1.76        | 1.71        | 1.69        | 1.68       | 1.63       | 1.65        | 1.63        | 1.62        | 1.63       | 1.62       | 1.60        | 1.61        | 1.61        | 1.61       |
| (0.24,0.26] | --          | --          | --          | --         | --         | --          | --          | --          | 1.78       | 1.76       | 1.73        | 1.69        | 1.66        | 1.64       | 1.59       | 1.64        | 1.61        | 1.60        | 1.59       | 1.58       | 1.59        | 1.58        | 1.58        | 1.57       |
| (0.26,0.28] | --          | --          | --          | --         | --         | --          | 1.86        | 1.81        | 1.78       | 1.71       | 1.69        | 1.66        | 1.65        | 1.64       | 1.59       | 1.57        | 1.58        | 1.58        | 1.57       | 1.57       | 1.55        | 1.55        | 1.55        | 1.56       |
| (0.28,0.3]  | --          | --          | --          | --         | 2.03       | --          | 1.84        | 1.79        | 1.74       | 1.69       | 1.66        | 1.65        | 1.62        | 1.62       | 1.60       | 1.59        | 1.57        | 1.57        | 1.56       | 1.56       | 1.54        | 1.54        | 1.54        | 1.54       |
| (0.3,0.32]  | --          | --          | --          | --         | --         | 1.91        | 1.83        | --          | 1.75       | 1.69       | 1.68        | 1.64        | 1.64        | 1.62       | 1.60       | 1.58        | 1.58        | 1.55        | 1.54       | 1.56       | 1.54        | 1.51        | 1.53        | 1.52       |
| (0.32,0.34] | --          | --          | --          | --         | --         | 1.85        | 1.85        | 1.77        | 1.69       | 1.69       | 1.63        | 1.59        | 1.59        | 1.60       | 1.58       | 1.54        | 1.52        | 1.55        | 1.53       | 1.51       | 1.51        | 1.50        | 1.52        | 1.49       |
| (0.34,0.36] | --          | --          | --          | --         | --         | 1.90        | 1.84        | 1.69        | 1.71       | 1.67       | 1.65        | 1.64        | 1.57        | 1.59       | 1.58       | 1.52        | 1.53        | 1.53        | 1.52       | 1.52       | 1.49        | 1.48        | 1.48        | 1.49       |
| (0.36,0.38] | --          | --          | --          | --         | 2.03       | 1.92        | 1.74        | 1.75        | 1.69       | 1.66       | 1.63        | 1.61        | 1.58        | 1.57       | 1.55       | 1.55        | 1.53        | 1.52        | 1.51       | 1.51       | 1.50        | 1.47        | 1.50        | 1.50       |
| (0.38,0.4]  | --          | --          | --          | --         | 1.96       | 1.89        | 1.78        | 1.74        | 1.71       | 1.66       | 1.62        | 1.60        | 1.58        | 1.57       | 1.54       | 1.53        | 1.52        | 1.51        | 1.50       | 1.50       | 1.50        | 1.48        | 1.49        | 1.49       |
| (0.4,0.42]  | 3.93        | --          | --          | --         | 1.99       | 1.87        | 1.80        | 1.73        | 1.68       | 1.66       | 1.63        | 1.59        | 1.58        | 1.56       | 1.56       | 1.51        | 1.52        | 1.51        | 1.50       | 1.50       | 1.49        | 1.49        | 1.48        | 1.48       |
| (0.42,0.44] | --          | --          | --          | --         | 1.97       | --          | 1.79        | 1.74        | 1.67       | 1.65       | 1.62        | 1.58        | 1.57        | 1.56       | 1.54       | 1.51        | 1.49        | 1.50        | 1.50       | 1.49       | 1.48        | 1.47        | 1.48        | 1.47       |
| (0.44,0.46] | --          | --          | --          | 2.05       | 1.99       | 1.82        | 1.77        | 1.71        | 1.64       | 1.64       | 1.60        | 1.59        | 1.55        | 1.54       | 1.51       | 1.50        | 1.48        | 1.47        | 1.48       | 1.49       | 1.47        | 1.47        | 1.47        | 1.47       |
| (0.46,0.48] | --          | --          | --          | --         | 1.97       | 1.86        | 1.73        | 1.71        | 1.66       | 1.64       | 1.61        | 1.58        | 1.55        | 1.54       | 1.53       | 1.52        | 1.48        | 1.50        | 1.49       | 1.48       | 1.48        | 1.47        | 1.46        | 1.47       |
| (0.48,0.5]  | --          | --          | --          | --         | 1.96       | 1.84        | 1.81        | 1.72        | 1.65       | 1.63       | 1.61        | 1.57        | 1.56        | 1.54       | 1.52       | 1.49        | 1.49        | 1.50        | 1.49       | 1.48       | 1.47        | 1.47        | 1.47        | 1.46       |



## Figures

**Figure 1.** Source literature and process for selection of cardiovascular risk factor SNPs. Details of references supporting the inclusion of the selected SNPs is provided in S.T1

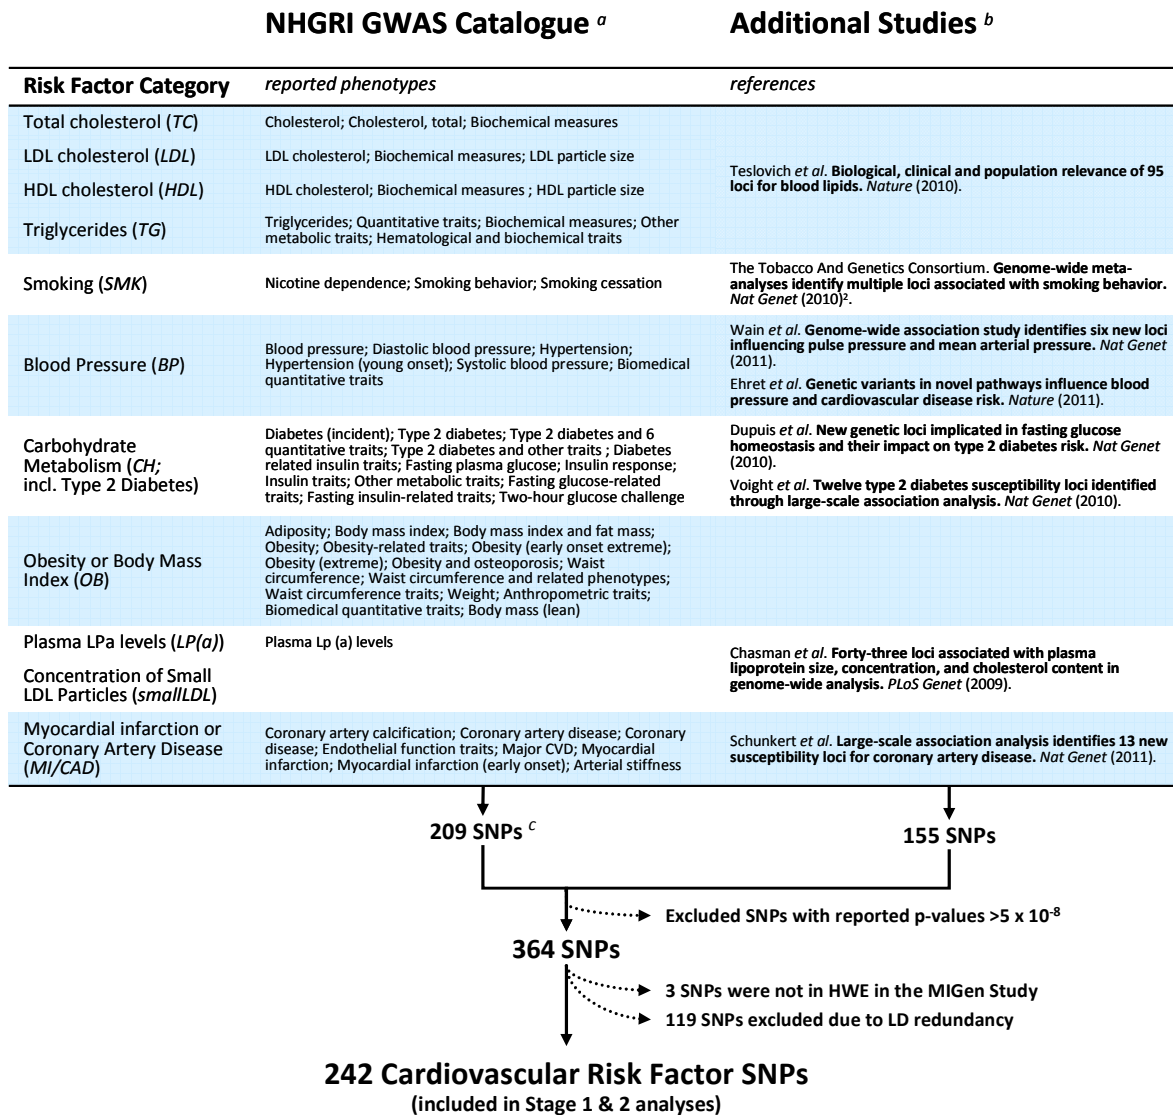

- National Human Genome Research Institute Catalogue of Published Genome-Wide Association Studies[4], queried June 30<sup>th</sup> 2010.
- Data from some relevant additional studies that were not included in the NHGRI catalogue on the date of our search were subsequently added to the list of CVRF SNPs. This is not an exhaustive list of all additional potentially relevant studies that have been published to date.
- Querying the NHGRI catalogue (June 30<sup>th</sup> 2010) using the search terms shown in the 'Reported Phenotypes' column above returns more than 209 SNPs. This is because some search terms are of a general nature (e.g. biochemical measures, quantitative traits), and some of the results they return relate to specific sub-phenotypes that were not relevant for our analysis. We removed SNPs associated with these non-relevant phenotypes (unless they were also associated with phenotypes of interest), resulting in a list of 209 unique SNPs related to phenotypes of interest.

**Figure 2.** Graphical representation of interaction pairs tested in each Analysis.

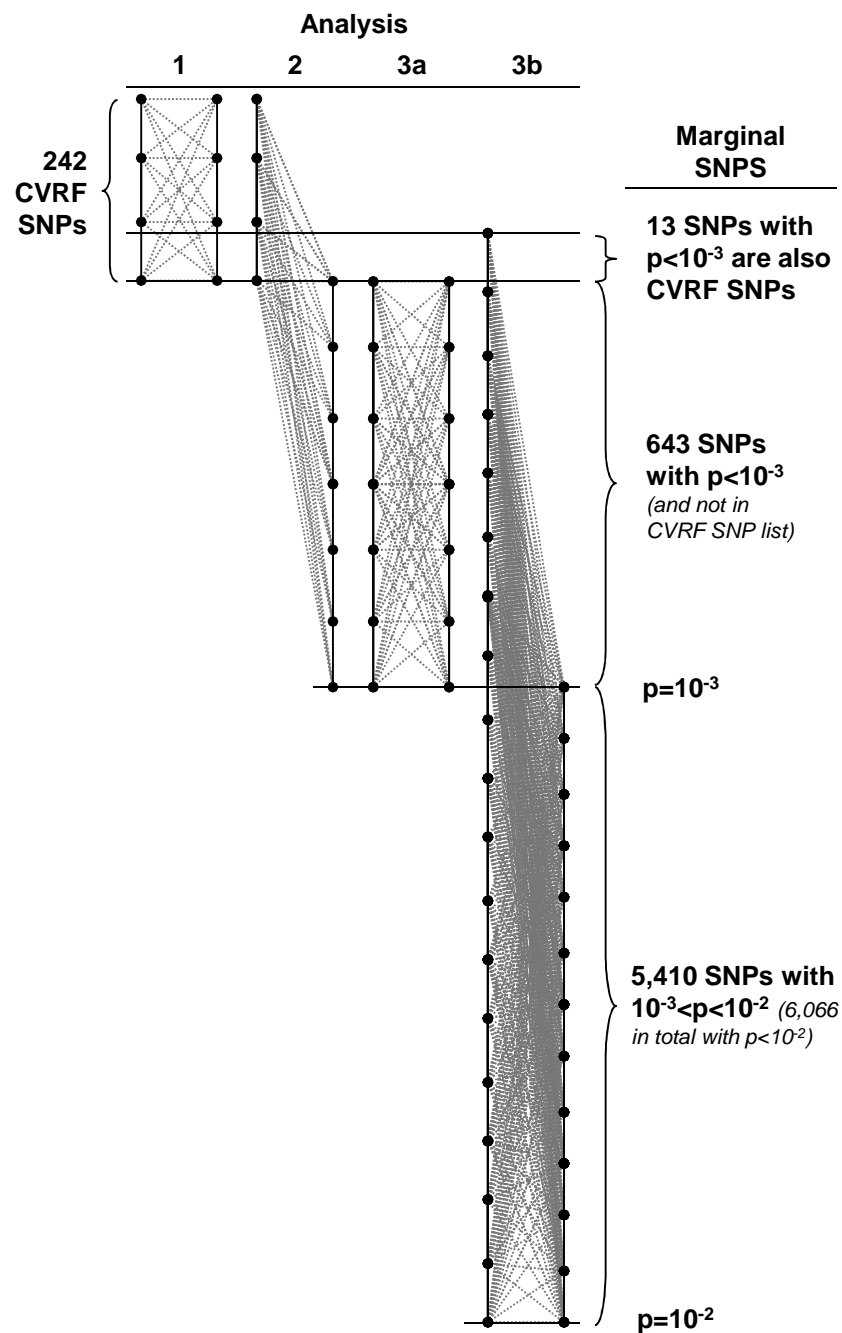

Sets of SNPs included in each Analysis are represented on the vertical axis (not to scale) and indicated by braces ('{ ' & '}' ); CVRF SNP and marginal SNPs in the left and right columns, respectively). Individual pair-wise tests are represented schematically as dotted grey lines connecting the elements (black dots) of two lists of SNPs (represented by vertical lines). *Analysis 1*: 29,161 pair-wise tests among 242 CVRF SNPs; *Analysis 2*: 155,606 pair-wise tests between the 242 CVRF SNPs and the 643 SNPs that had marginal  $p$ -value  $< 10^{-3}$  for association with MI in MIGen and that were not included in Analysis 1; *Analysis 3a*: 206,403 pair-wise tests among the 643 marginal SNPs from Analysis 2; *Analysis 3b*: 18,180,305 pair-wise tests among 6,066 SNPs with marginal  $p < 10^{-2}$  in MIGen after excluding tests from previous Analyses.

---

**Figure 3.** Distribution of observed results with respect to their empirical expected null distribution, and computation of significance threshold to account for non-independence between tests (Analyses 2, 3a and 3b shown in rows 1-3 respectively; see Figure 2 in the main manuscript for results of the Analysis 1 analysis).

*QQ-plots (left column).* Quantile-quantile plots showing rank-ordered observed results (black points; *y-axis*) against expected results (*x-axis*) estimated from a large number of permutations of the analysis under the null hypothesis (randomized MI status). See S3.5 for computation methods. The shaded gray area corresponds to the 95% confidence interval of the permuted expected results. Note that, while our estimates of the expected results for Analyses 2-3 should be robust since they correspond to the medians for each rank, the boundaries of the 95% CI are less stable because they correspond to the 2.5<sup>th</sup> and 97.5<sup>th</sup> percentiles of the results from a smaller number (shown) of permutations than in Analysis 1 (main manuscript, Figure 2), particularly for Analysis 3b. The 95% CI of a normal distribution is indicated by the dotted lines.

*Computation of significance threshold (right column).* Data are shown as a density plot, indicating the relative proportions (density, *x-axis*) of results throughout the range of maximum p-values (*y-axis*) obtained in a large number (see S3.4) of permutations under the null hypothesis (Test B; dotted line). A plot of the theoretical beta-distribution of these results, whose parameters were estimated using the empirical distribution, is shown as a solid line. The top result for Test A, as well as the 95<sup>th</sup> percentile of the beta-distribution, corresponding with the  $-\log_{10}(\text{p-value})$  threshold required to achieve a Type 1 error rate of  $\alpha=0.05$  are indicated by the arrows (see S3.4 for methods).

Figure 3. cont.

**Quantile-Quantile Plot**

**Computation of Significance Threshold**

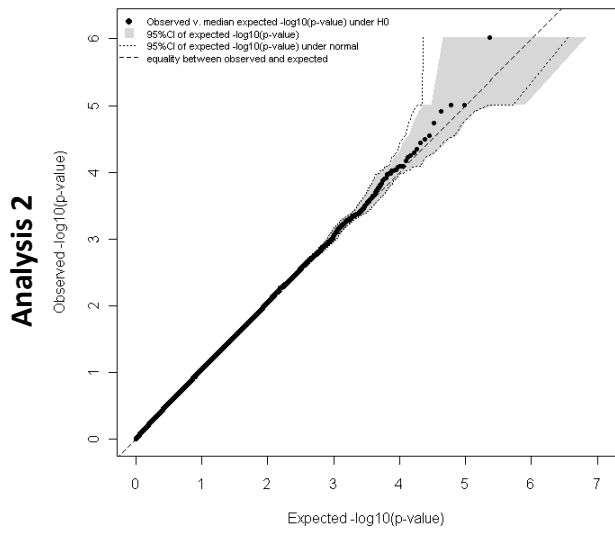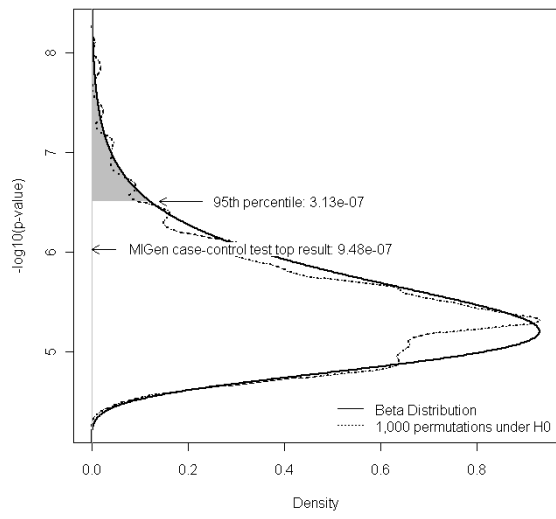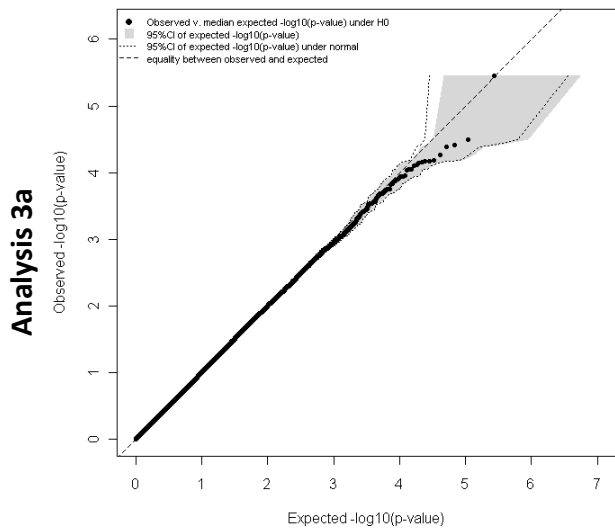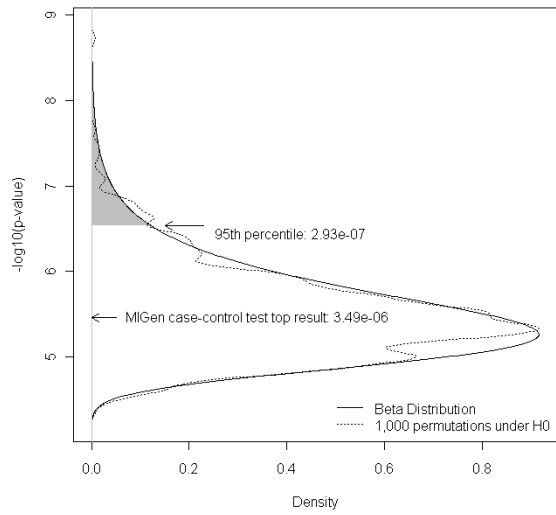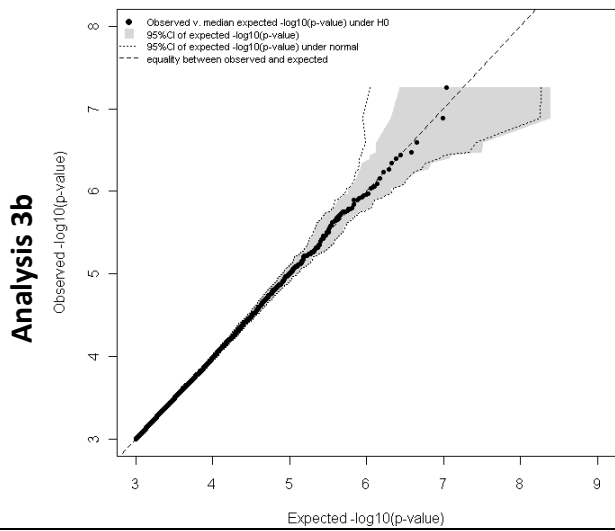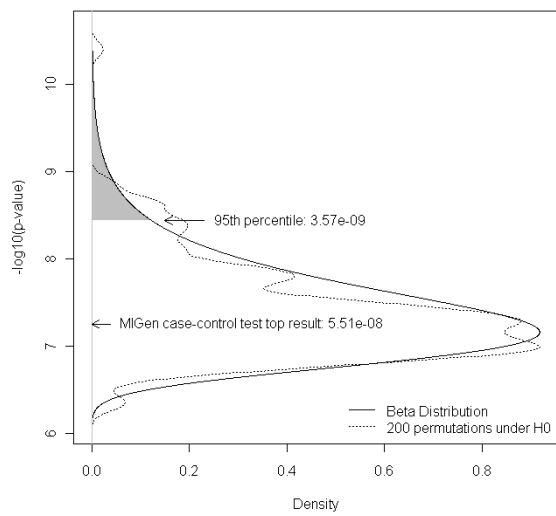

**Figure 4.** Power computation.

Effect sizes for pairs of SNPs with MAFs between 0.02 and 0.5, under dominant  $\times$  dominant, recessive  $\times$  recessive or additive  $\times$  additive interaction models (Analyses 1, 2, 3a and 3b are shown in rows 1-4, respectively). Allele bins for the SNPs compared are shown on the  $x$ - and  $y$ -axes, and the effect size our study has 80% power to detect is shown on the  $z$ -axis. MAF pairs with missing data (value of 0 on the  $z$ -axis) indicate instances where the effect size could not be calculated for any of the SNP pairs sampled because of the low frequency of the double rare homozygote. Results are duplicated on either side of a diagonal through the near apex. See S.T3 for raw results.

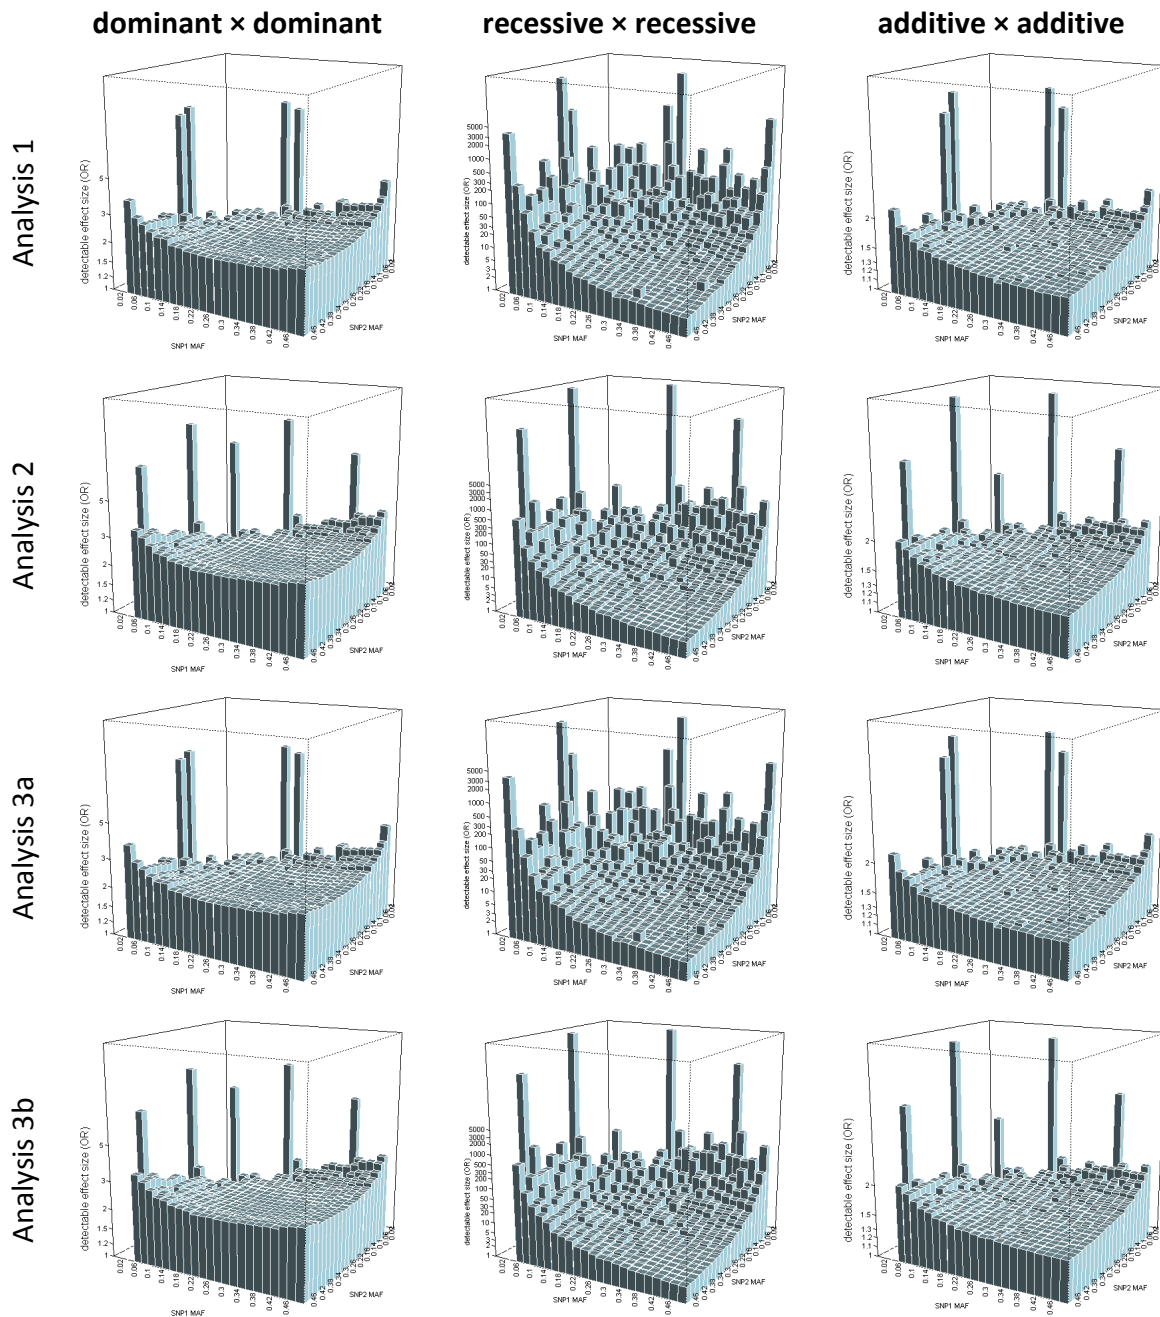

## Note 1

---

### Joint case-control/case-only interaction analysis

#### 1. Introduction

If we observe a correlation between the alleles or genotypes at two loci in a sample of disease cases, but not in the general population, this would indicate that these variants interact to modulate disease risk. In a case-only interaction analysis, we compute correlation statistics for SNP pairs that are uncorrelated (i.e. in LD) in the general population. Additional power in a case-only analysis is gained from the assumption that the correlation between loci in controls is 0; therefore, this proportion is not an estimation and contains no error.

This approach has the disadvantage that interaction testing cannot be performed between variants that are correlated in the general population. However, this design can be extended to a joint case-control/case-only design, which formally tests for differences in the level of two-locus correlation among cases compared to that among controls, allowing us to also consider SNPs that are correlated in the general population, but that may have a different level of correlation among cases.

#### 2. Methods

We have implemented this test by fitting a multinomial regression model, which tests for a significant interaction between case-control status and the genotype of one SNP (SNP 1) as a predictor of the genotype of another SNP (SNP 2); essentially, this compares the level of correlation between the two SNPs among cases to that among controls (4 df).

$$\begin{array}{ccccccc} \text{SNP 2} & \sim & \text{SNP 1} & + & \text{MI} & + & \text{SNP 1} \times \text{MI} & + & \text{AGE} & + & \text{SEX} & + & \text{PC1} & + & \text{PC2} \\ | & & | & & | & & | & & | & & | & & | & & | \\ \text{3-level} & & \text{Main effects} & & \text{Interaction} & & & & \text{Covariates} & & & & & & \\ \text{response} & & & & \text{term} & & & & & & & & & & \\ \text{variable} & & & & & & & & & & & & & & \end{array}$$

Similarly to the main case-control analysis reported in this manuscript, we tested for interaction by using a likelihood ratio test to compare the fit of a multinomial regression model containing the SNP 1 x MI status term to an equivalent model lacking this term, with adjustment for age, sex and the first two genetic principal components (PC).

### 3. Results

We compared the results obtained using the case-control test reported in the main manuscript and those obtained using the joint case-control/case-only models, and observed a strong correlation (Pearson correlation coefficient,  $r^2=0.985$  and  $r^2=0.972$  for Analyses 1 and 2 respectively; Figure).

### 4. Comments

The gain in power expected by using the case-only interaction design is likely to be neutralized by the additional error involved in estimating the two-locus correlation among controls in the more general joint case-control/case-only design. Mathematically, the case-control (Test A) and joint case-control/case-only are very similar, with the result that we observe a strong correlation between the results under each design.

The joint case-control/case-only design was previously reported by Zhao *et al.*[60] to be more powerful than a standard logistic regression, but as highlighted by Cordell[61], this might be because of the smaller numbers of degrees of freedom that results from using an allelic test. This allelic test only considers additive interaction models, which may be a disadvantage depending on whether additive  $\times$  additive models are truly the most common type of gene-gene interaction. Our implementation of the joint case-control/case-only design allows us to capture all interaction models, and also has the advantage of allowing for covariate adjustment.

---

**Note 1, Figure.** Comparison of results using the case-control (Test A) and joint case-control/case-only designs.

Analysis 1.

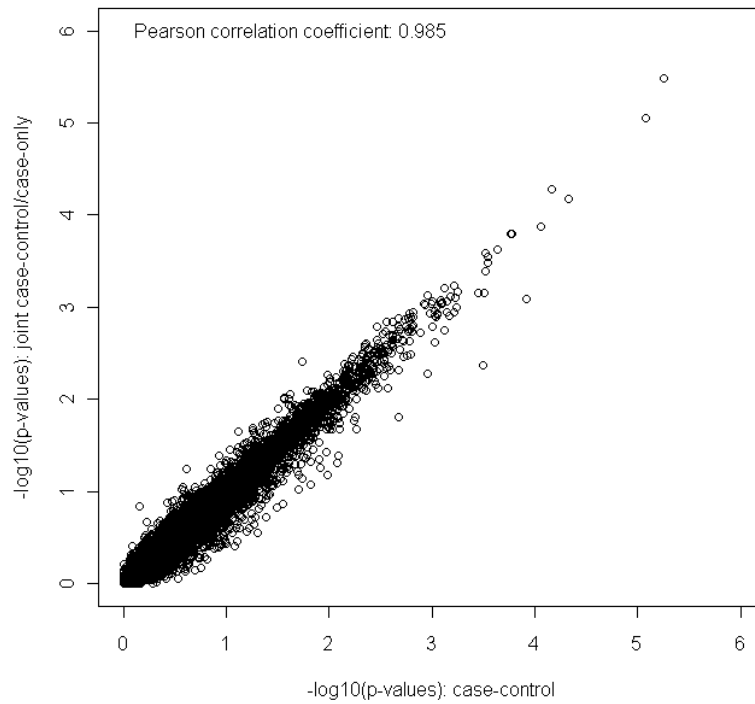

Analysis 2

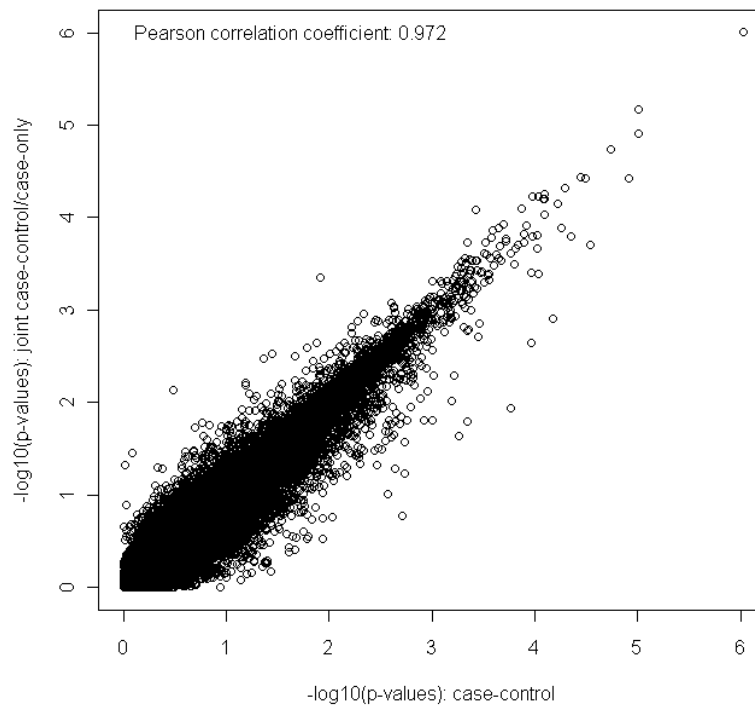



## Note 2

---

### Logic Regression analysis

#### 1. Introduction

Logic regression was used to perform a preliminary scan for complex interactions, and to investigate whether higher orders of interaction (e.g. pair-wise, 3-way, 4-way, etc.) are more informative in terms of improving the fit of a regression model. Logic regression is an adaptive regression methodology developed mainly for exploring high-order interactions in genomic data[62,63]. It is also useful for predicting the outcome in regression problems based on Boolean combinations of logic variables (for instance a SNP coded as the rare homozygote genotype or not) using logical expressions (e.g. 'AND', 'OR', etc.) (see ref[63] for further details). These combinations are known as logic trees, L.

The order of interactions expressed by a logic tree is given by its size, which corresponds to the number of combinations of SNPs it contains, each connected by a logical expression. Moreover, for complex diseases we may want to simultaneously consider the additive effects of more than one logic tree as potential predictors of the outcome of interest. Thus, we can model these variables (as predictors of the likelihood of a dichotomous outcome, for example) as follows:

$$\text{logit}(P(Y = 1; X)) = b_0 + bX + \sum_{i=1}^j b_i L_i ,$$

where each  $L_j$  is a separate logic tree,  $Y$  is the outcome ( $Y=0$  for controls,  $Y=1$  for cases) and  $X$  denotes covariates (e.g. age, sex, eigen vectors, etc.). Note that, since this technique searches for logical combinations of genetic risk factors, the SNPs being analyzed must necessarily be coded under dominant/recessive models, such that risk may be associated with the presence or absence of either allele.

#### 2. Methods

In order to assess the relative gain of information that might be available by exploring higher order interactions, we used a cross-validation approach implemented in the *LogicReg::logreg* function to search for robust models containing up to 5 SNPs distributed across up to 5 logic trees. The sample was partitioned into a training set, in which these models were fit, and a test set, in which the robustness of the best fitting models was assessed. The “quality” of the models under consideration is assessed using

a score function, which in our case (logistic regression of predictors on the dichotomous MI response) reflects the model deviance, where the best fitting models are those that have the lowest total deviance. Having estimated the optimal model type/complexity, we then performed an exhaustive search of the dataset to identify the best fitting scenario (combination of SNPs and logic trees).

We performed this model search among the 242 risk factor SNPs analyzed in Analysis 1, and the 643 SNPs with marginal association with MI that were analyzed in Analysis 3a. We were unable to use the logic regression approach to search for interactions between the SNPs included in Analysis 2 because this consisted of two mutually exclusive sets of SNPs (S.F2), whereas *LogicReg::logreg* is currently restricted to searching for interactions within a single set of SNPs. Moreover, due to computational restrictions, we were unable to perform a joint search of all 6,066 SNPs in Analysis 3b of the main analysis, so we limited this search to a random sample of 2,000 of the Analysis 3b SNPs. All of these analyses were adjusted for sex.

### 3. Results

In the following figures, we present the results of the model search (left column) and the search for the best fitting scenario under the optimal model (right column). The results of the model search are presented as a graph of the average deviances (*y-axis*) of all models tested (black squares), where the best fitting model has the lowest deviance. The number of logic trees in the model is shown in the black squares, and the number of variants distributed across these trees indicated on the *x-axis*.

#### Analysis 1 – SNPs strongly associated with CAD risk or with classical cardiovascular risk factors.

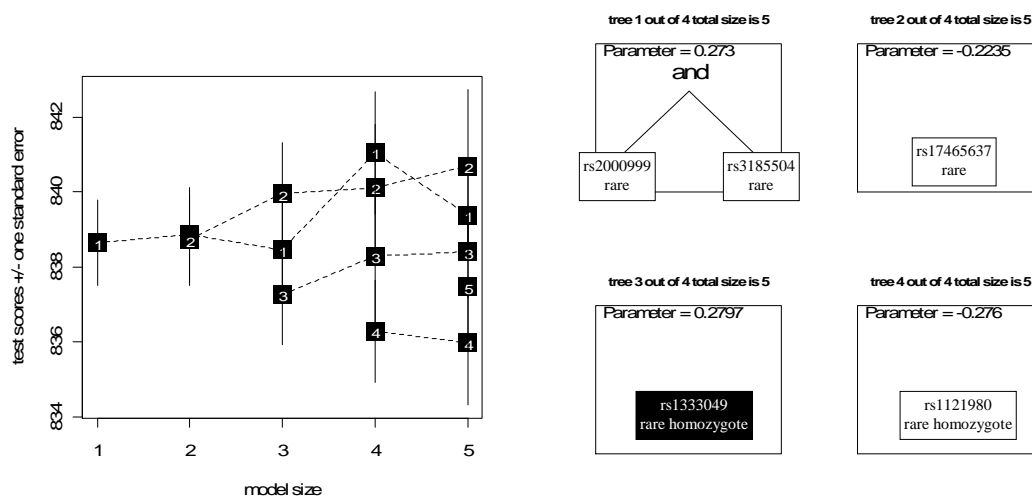

The best scoring model contained 5 variants distributed over 4 logic trees, as follows:

$$MI\ risk \sim 0.273*[presence\ of\ rs2000999\_rare\ AND\ rs3184504\_rare] - 0.223*[presence\ of\ rs17465637\_rare] + 0.28*[absence\ of\ rs1333049\_rare\ homozygote] - 0.276*[presence\ of\ rs1121980\_rare\ homozygote]$$

These results highlight the fact that model fit is improved primarily by the additive effects of individual variants, and that interaction effects only begin to become relevant when the model is already very complex. Note that, unlike in the subsequent Analyses, addition of multiple single loci significantly improves model fit (i.e. improves the estimation of risk) because these variants are already known to be relevant for cardiovascular risk factors or CAD endpoints.

**Analysis 3a – SNPs with modest marginal association with MI in the MIGen study (with  $p \leq 10^{-3}$ ).**

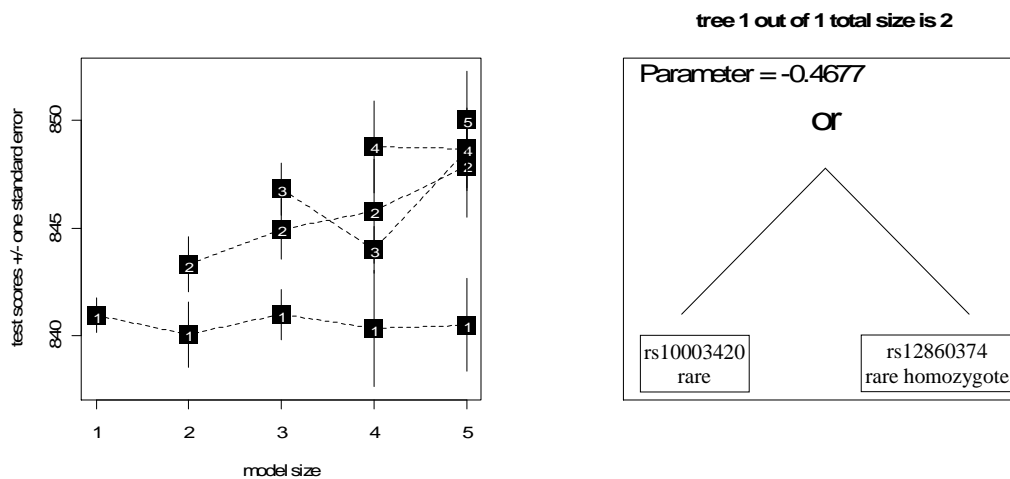

The best scoring model contained 2 variants in a single logic tree, as follows:

$$MI\ risk \sim -0.468*[presence\ of\ rs10003420\_rare\ OR\ rs12860374\_rare\ homozygote]$$

On the basis of these results, we find no evidence to suggest that high-order interactions are important for MI risk. A second order interaction provided the best model fit, but this fit was not significantly better than that of models that consisted of single SNPs or 3-, 4-, or 5-way interaction.

**Analysis 3b – A sample of 2000 SNPs with modest marginal association with MI in the MIGen study (with  $p \leq 10^{-2}$ ).**

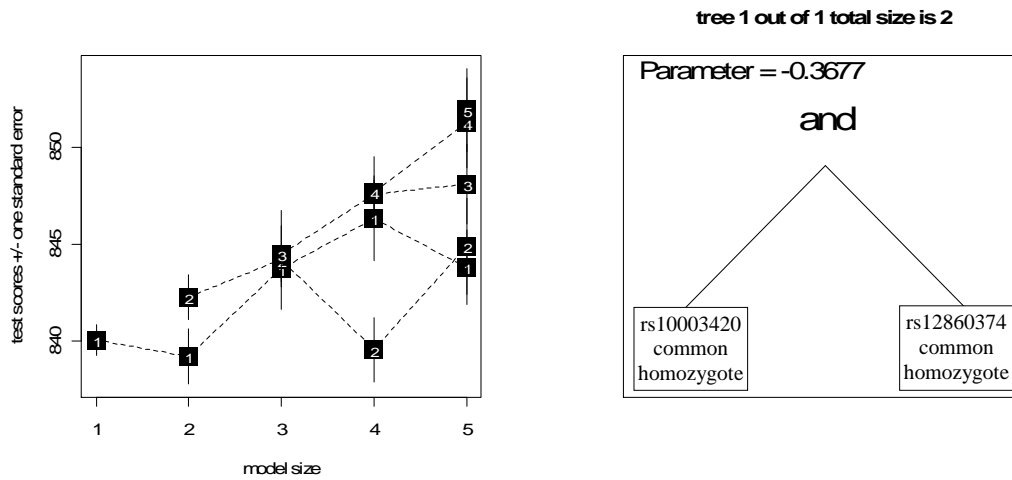

The best scoring model contained 2 variants in a single logic tree, as follows:

$$MI\ risk \sim -0.368 * [presence\ of\ rs1887797\_common\ homozygote\ AND\ rs31696\_common\ homozygote]$$

The results of this analysis are consistent with those from Analysis 3a, in showing no significant evidence to suggest that higher order interactions improve the estimation of disease risk over the information provided by single loci.

#### 4. Conclusion

In general, the results of this logic regression analysis are consistent with those of the analysis of gene-gene interactions described in the main manuscript in that they indicate that little additional information is to be gained from these data by exploring pair-wise or higher order interactions.

# Appendix 1

## MIGen Investigators

### **MEMBERS**

Sekar Kathiresan (leader), Benjamin F Voight, Shaun Purcell, Kiran Musunuru, Diego Ardissino, Pier M Mannucci, Sonia Anand, James C Engert, Nilesh J Samani, Heribert Schunkert, Jeanette Erdmann, Muredach P Reilly, Daniel J Rader, Thomas Morgan, John A Spertus, Monika Stoll, Domenico Girelli, Pascal P McKeown, Chris C Patterson, David S Siscovick, Christopher J O'Donnell, Roberto Elosua, Leena Peltonen, Veikko Salomaa, Stephen M Schwartz, Olle Melander, David Altshuler

**Italian Atherosclerosis, Thrombosis and Vascular Biology Study.** Diego Ardissino, Pier Angelica Merlini, Carlo Berzuini, Luisa Bernardinelli, Flora Peyvandi, Marco Tubaro, Patrizia Celli, Maurizio Ferrario, Raffaella Fetiveau, Nicola Marziliano, Giorgio Casari, Michele Galli, Flavio Ribichini, Marco Rossi, Francesco Bernardi, Pietro Zonzin, Alberto Piazza, Pier M Mannucci

**Heart Attack Risk in Puget Sound.** Stephen M Schwartz, David S Siscovick, Jean Yee, Yechiel Friedlander

**Registre Gironi del COR.** Roberto Elosua, Jaume Marrugat, Gavin Lucas, Isaac Subirana, Joan Sala, Rafael Ramos

**Massachusetts General Hospital Premature Coronary Artery Disease Study.** Sekar Kathiresan, James B Meigs, Gordon Williams, David M Nathan, Calum A MacRae, Christopher J O'Donnell

**FINRISK.** Veikko Salomaa, Aki S Havulinna, Leena Peltonen

**Malmö Diet and Cancer Study.** Olle Melander, Goran Berglund

### **FUNDING SOURCES**

**HARPS.** The HARPS study was supported by the grants (R01HL056931, P30ES007033) and a contract (N01HD013107) from US National Institutes of Health.

**REGICOR.** The REGICOR study was partially funded by the Ministerio de Sanidad y Consumo, Instituto de Salud Carlos III (Red HERACLES RD06/0009), the CIBER Epidemiología y Salud Pública, the FIS and AGAUR Generalitat de Catalunya.

**Massachusetts General Hospital.** The MIGen study was funded by the US National Institutes of Health (NIH) and National Heart, Lung, and Blood Institute's STAMPEED genomics research program through a grant to D.A. S.K. is supported by a Doris Duke Charitable Foundation Clinical Scientist Development Award, a charitable gift from the Fannie E. Rippel Foundation, the Donovan Family Foundation, a career development award from the NIH and the Department of Medicine and Cardiovascular Research Center at Massachusetts General Hospital. J.B.M. is supported by grant K24 DK080140 from the NIH.

**Broad Institute.** Genotyping was partially funded by The Broad Institute Center for Genotyping and Analysis, which is supported by grant U54 RR020278 from the National Center for Research Resources.

**FINRISK.** V.S. was supported by the Sigrid Juselius Foundation. L.P. was supported by the Center of Excellence in Complex Disease Genetics of the Academy of Finland, the Nordic Center of Excellence in Disease Genetics and the Finnish Foundation for Cardiovascular Research.

## Appendix 2

### WTCCC Investigators

#### **MEMBERS**

##### **Primary Investigators**

David Bentley, Matthew A. Brown, Lon R. Cardon, Mark Caulfield, David G. Clayton, Alistair Compston, Nick Craddock, Panos Deloukas, Peter Donnelly, Martin Farrall, Stephen C. L. Gough, Alistair S. Hall, Andrew T. Hattersley, Adrian V. S. Hill, Dominic P. Kwiatkowski, Christopher G. Mathew, Mark I. McCarthy, Willem H. Ouwehand, Miles Parkes, Marcus Pembrey, Nazneen Rahman, Nilesh J. Samani, Michael R. Stratton, John A. Todd, Jane Worthington

##### **Management Committee**

Paul R. Burton, David G. Clayton, Lon R. Cardon, Nick Craddock, Panos Deloukas, Audrey Duncanson, Dominic P. Kwiatkowski, Mark I. McCarthy, Willem H. Ouwehand, Nilesh J. Samani, John A. Todd, Peter Donnelly, (Chair)

##### **Data and Analysis Committee**

Jeffrey C. Barrett, Paul R. Burton, Dan Davison, Peter Donnelly, Doug Easton, David Evans, Hin-Tak Leung, Jonathan L. Marchini, Andrew P. Morris, Chris C. A. Spencer, Martin D. Tobin, Lon R. Cardon, (Co-Chair) & David G. Clayton, (Co-Chair)

##### **UK Blood Services and University of Cambridge Controls**

Antony P. Attwood, James P. Boorman, Barbara Cant, Ursula Everson, Judith M. Hussey, Jennifer D. Jolley, Alexandra S. Knight, Kerstin Koch, Elizabeth Meech, Sarah Nutland, Christopher V. Prowse, Helen E. Stevens, Niall C. Taylor, Graham R. Walters, Neil M. Walker, Nicholas A. Watkins, Thilo Winzer, John A. Todd & Willem H. Ouwehand

##### **1958 Birth Cohort Controls**

Richard W. Jones, Wendy L. McArdle, Susan M. Ring, David P. Strachan, Marcus Pembrey

##### **Coronary Artery Disease**

Stephen G. Ball, Anthony J. Balmforth, Jennifer H. Barrett, D. Timothy Bishop, Mark M. Iles, Azhar Maqbool, Nadira Yuldasheva, Alistair S. Hall (Leeds), Peter S. Braund, Paul R. Burton, Richard J. Dixon, Massimo Mangino, Suzanne Stevens, Martin D. Tobin, John R. Thompson, Nilesh J. Samani

##### **DNA, Genotyping, Data QC and Informatics**

Suzannah J. Bumpstead, Amy Chaney, Kate Downes, Mohammed J. R. Ghorri, Rhian Gwilliam, Sarah E. Hunt, Michael Inouye, Andrew Keniry, Emma King, Ralph McGinnis, Simon Potter, Rathi Ravindrarajah, Pamela Whittaker, Claire Widdon, David Withers, Panos Deloukas, Hin-Tak Leung, Sarah Nutland, Helen E. Stevens, Neil M. Walker, John A. Todd

##### **Statistics**

Doug Easton, David G. Clayton, Paul R. Burton, Martin D. Tobin, Jeffrey C. Barrett, David Evans, Andrew P. Morris, Lon R. Cardon, Niall J. Cardin, Dan Davison, Teresa Ferreira, Joanne Pereira-Gale, Ingileif B. Hallgrimsdóttir, Bryan N. Howie, Jonathan L. Marchini, Chris C. A. Spencer, Zhan Su, Yik Ying Teo, Damjan Vukcevic, Peter Donnelly

#### **FUNDING SOURCES**

The principal funder of this project was the Wellcome Trust. Case collections were funded by: Arthritis Research Campaign, BDA Research, British Heart Foundation, British Hypertension Society, Diabetes UK, Glaxo-Smith Kline Research and Development, Juvenile Diabetes Research Foundation, National Association for Colitis and Crohn's disease, SHERT (The Scottish Hospitals Endowment Research Trust), St Bartholomew's and The Royal London Charitable Foundation, UK Medical Research Council, UK NHS R&D and the Wellcome Trust. Statistical analyses were funded by a Commonwealth Scholarship, EU, EPSRC, Fundação para a Ciência e a Tecnologia (Portugal), National Institutes of Health, National Science Foundation and the Wellcome Trust. For the 1958 Birth Cohort, venous blood collection was funded by the UK Medical Research Council and cell-line production, DNA extraction and processing by the Juvenile Diabetes Research Foundation and the Wellcome Trust.

## References

1. Myocardial Infarction Genetics Consortium (2009) Genome-wide association of early-onset myocardial infarction with single nucleotide polymorphisms and copy number variants. *Nat Genet* 41: 334-341.
2. Li Y, Willer CJ, Ding J, Scheet P, Abecasis GR (2010) MaCH: using sequence and genotype data to estimate haplotypes and unobserved genotypes. *Genet Epidemiol* 34: 816-834.
3. Wellcome Trust Case Control Consortium (2007) Genome-wide association study of 14,000 cases of seven common diseases and 3,000 shared controls. *Nature* 447: 661-678.
4. Hindorf LA, Junkins HA, Mehta JP, Manolio TA (2009) A Catalog of Published Genome-Wide Association Studies.
5. Saxena R, Hivert MF, Langenberg C, Tanaka T, Pankow JS, *et al.* (2010) Genetic variation in GIPR influences the glucose and insulin responses to an oral glucose challenge. *Nat Genet* 42: 142-148.
6. Dupuis J, Langenberg C, Prokopenko I, Saxena R, Soranzo N, *et al.* (2010) New genetic loci implicated in fasting glucose homeostasis and their impact on type 2 diabetes risk. *Nat Genet* 42: 105-116.
7. Chasman DI, Pare G, Zee RY, Parker AN, Cook NR, *et al.* (2008) Genetic loci associated with plasma concentration of low-density lipoprotein cholesterol, high-density lipoprotein cholesterol, triglycerides, apolipoprotein A1, and Apolipoprotein B among 6382 white women in genome-wide analysis with replication. *Circ Cardiovasc Genet* 1: 21-30.
8. R Development Core Team (2010) R: A language and environment for statistical computing. R Foundation for Statistical Computing, Vienna, Austria. URL <http://www.R-project.org/>
9. Purcell S, Neale B, Todd-Brown K, Thomas L, Ferreira MA, *et al.* (2007) PLINK: a tool set for whole-genome association and population-based linkage analyses. *Am J Hum Genet* 81: 559-575.
10. Li W and Reich J (2000) A complete enumeration and classification of two-locus disease models. *Hum Hered* 50: 334-349.
11. Marchini J, Donnelly P, Cardon LR (2005) Genome-wide strategies for detecting multiple loci that influence complex diseases. *Nat Genet* 37: 413-417.
12. Kathiresan S (2009) Lp(a) lipoprotein redux--from curious molecule to causal risk factor. *N Engl J Med* 361: 2573-2574.
13. Clarke R, Peden JF, Hopewell JC, Kyriakou T, Goel A, *et al.* (2009) Genetic variants associated with Lp(a) lipoprotein level and coronary disease. *N Engl J Med* 361: 2518-2528.
14. Tregouet DA, Konig IR, Erdmann J, Munteanu A, Braund PS, *et al.* (2009) Genome-wide haplotype association study identifies the SLC22A3-LPAL2-LPA gene cluster as a risk locus for coronary artery disease. *Nat Genet* 41: 283-285.
15. Lake SL, Lyon H, Tantisira K, Silverman EK, Weiss ST, *et al.* (2003) Estimation and tests of haplotype-environment interaction when linkage phase is ambiguous. *Hum Hered* 55: 56-65.
16. Kathiresan S, Willer CJ, Peloso GM, Demissie S, Musunuru K, *et al.* (2009) Common variants at 30 loci contribute to polygenic dyslipidemia. *Nat Genet* 41: 56-65.
17. Teslovich TM, Musunuru K, Smith AV, Edmondson AC, Stylianou IM, *et al.* (2010) Biological, clinical and population relevance of 95 loci for blood lipids. *Nature* 466: 707-713.
18. Ober C, Nord AS, Thompson EE, Pan L, Tan Z, *et al.* (2009) Genome-wide association study of plasma lipoprotein(a) levels identifies multiple genes on chromosome 6q. *J Lipid Res* 50: 798-806.
19. Samani NJ, Erdmann J, Hall AS, Hengstenberg C, Mangino M, *et al.* (2007) Genomewide association analysis of coronary artery disease. *N Engl J Med* 357: 443-453.
20. Loos RJ, Lindgren CM, Li S, Wheeler E, Zhao JH, *et al.* (2008) Common variants near MC4R are associated with fat mass, weight and risk of obesity. *Nat Genet* 40: 768-775.
21. Kathiresan S, Melander O, Guiducci C, Surti A, Burtt NP, *et al.* (2008) Six new loci associated with blood low-density lipoprotein cholesterol, high-density lipoprotein cholesterol or triglycerides in humans. *Nat Genet* 40: 189-197.
22. Schunkert H, Konig IR, Kathiresan S, Reilly MP, Assimes TL, *et al.* (2011) Large-scale association analysis identifies 13 new susceptibility loci for coronary artery disease. *Nat Genet* 43: 333-338.
23. Ehret GB, Munroe PB, Rice KM, Bochud M, Johnson AD, *et al.* (2011) Genetic variants in novel pathways influence blood pressure and cardiovascular disease risk. *Nature* 478: 103-109.
24. Levy D, Ehret GB, Rice K, Verwoert GC, Launer LJ, *et al.* (2009) Genome-wide association study of blood pressure and hypertension. *Nat Genet*
25. Kamatani Y, Matsuda K, Okada Y, Kubo M, Hosono N, *et al.* (2010) Genome-wide association study of hematological and biochemical traits in a Japanese population. *Nat Genet* 42: 210-215.
26. Zeggini E, Scott LJ, Saxena R, Voight BF, Marchini JL, *et al.* (2008) Meta-analysis of genome-wide association data and large-scale replication identifies additional susceptibility loci for type 2 diabetes. *Nat Genet* 40: 638-645.
27. Willer CJ, Sanna S, Jackson AU, Scuteri A, Bonnycastle LL, *et al.* (2008) Newly identified loci that influence lipid concentrations and risk of coronary artery disease. *Nat Genet* 40: 161-169.

28. Newton-Cheh C, Johnson T, Gateva V, Tobin MD, Bochud M, *et al.* (2009) Genome-wide association study identifies eight loci associated with blood pressure. *Nat Genet* 41: 666-676.
29. Thorleifsson G, Walters GB, Gudbjartsson DF, Steinthorsdottir V, Sulem P, *et al.* (2009) Genome-wide association yields new sequence variants at seven loci that associate with measures of obesity. *Nat Genet* 41: 18-24.
30. Qi L, Cornelis MC, Kraft P, Stanya KJ, Linda Kao WH, *et al.* (2010) Genetic variants at 2q24 are associated with susceptibility to type 2 diabetes. *Hum Mol Genet* 19: 2706-2715.
31. Aulchenko YS, Ripatti S, Lindqvist I, Boomsma D, Heid IM, *et al.* (2009) Loci influencing lipid levels and coronary heart disease risk in 16 European population cohorts. *Nat Genet* 41: 47-55.
32. Sabatti C, Service SK, Hartikainen AL, Pouta A, Ripatti S, *et al.* (2009) Genome-wide association analysis of metabolic traits in a birth cohort from a founder population. *Nat Genet* 41: 35-46.
33. Tsai FJ, Yang CF, Chen CC, Chuang LM, Lu CH, *et al.* (2010) A genome-wide association study identifies susceptibility variants for type 2 diabetes in Han Chinese. *PLoS Genet* 6: e1000847-
34. Chambers JC, Elliott P, Zabaneh D, Zhang W, Li Y, *et al.* (2008) Common genetic variation near MC4R is associated with waist circumference and insulin resistance. *Nat Genet* 40: 716-718.
35. Voight BF, Scott LJ, Steinthorsdottir V, Morris AP, Dina C, *et al.* (2010) Twelve type 2 diabetes susceptibility loci identified through large-scale association analysis. *Nat Genet* 42: 579-589.
36. Sandhu MS, Waterworth DM, Debenham SL, Wheeler E, Papadakis K, *et al.* (2008) LDL-cholesterol concentrations: a genome-wide association study. *Lancet* 371: 483-491.
37. Thorgeirsson TE, Gudbjartsson DF, Surakka I, Vink JM, Amin N, *et al.* (2010) Sequence variants at CHRNA3-CHRNA6 and CYP2A6 affect smoking behavior. *Nat Genet* 42: 448-453.
38. Erdmann J, Grosshennig A, Braund PS, König IR, Hengstenberg C, *et al.* (2009) New susceptibility locus for coronary artery disease on chromosome 3q22.3. *Nat Genet* 41: 280-282.
39. Willer CJ, Speliotes EK, Loos RJ, Li S, Lindgren CM, *et al.* (2009) Six new loci associated with body mass index highlight a neuronal influence on body weight regulation. *Nat Genet* 41: 25-34.
40. Tobacco and Genetics Consortium (2010) Genome-wide meta-analyses identify multiple loci associated with smoking behavior. *Nat Genet* 42: 441-447.
41. Zeggini E, Weedon MN, Lindgren CM, Frayling TM, Elliott KS, *et al.* (2007) Replication of genome-wide association signals in UK samples reveals risk loci for type 2 diabetes. *Science* 316: 1336-1341.
42. Meyre D, Delplanque J, Chevre JC, Lecoœur C, Lobbens S, *et al.* (2009) Genome-wide association study for early-onset and morbid adult obesity identifies three new risk loci in European populations. *Nat Genet* 41: 157-159.
43. Tarasov KV, Sanna S, Scuteri A, Strait JB, Orru M, *et al.* (2009) COL4A1 is associated with arterial stiffness by genome-wide association scan. *Circ Cardiovasc Genet* 2: 151-158.
44. Lowe JK, Maller JB, Pe'er I, Neale BM, Salit J, *et al.* (2009) Genome-wide association studies in an isolated founder population from the Pacific Island of Kosrae. *PLoS Genet* 5: e1000365-
45. Lindgren CM, Heid IM, Randall JC, Lamina C, Steinthorsdottir V, *et al.* (2009) Genome-wide association scan meta-analysis identifies three Loci influencing adiposity and fat distribution. *PLoS Genet* 5: e1000508-
46. Kooner JS, Chambers JC, Aguilar-Salinas CA, Hinds DA, Hyde CL, *et al.* (2008) Genome-wide scan identifies variation in MLXIPL associated with plasma triglycerides. *Nat Genet* 40: 149-151.
47. Rung J, Cauchi S, Albrechtsen A, Shen L, Rocheleau G, *et al.* (2009) Genetic variant near IRS1 is associated with type 2 diabetes, insulin resistance and hyperinsulinemia. *Nat Genet* 41: 1110-1115.
48. Pollin TI, Damcott CM, Shen H, Ott SH, Shelton J, *et al.* (2008) A null mutation in human APOC3 confers a favorable plasma lipid profile and apparent cardioprotection. *Science* 322: 1702-1705.
49. Heard-Costa NL, Zillikens MC, Monda KL, Johansson A, Harris TB, *et al.* (2009) NRXN3 is a novel locus for waist circumference: a genome-wide association study from the CHARGE Consortium. *PLoS Genet* 5: e1000539-
50. Prokopenko I, Langenberg C, Florez JC, Saxena R, Soranzo N, *et al.* (2009) Variants in MTNR1B influence fasting glucose levels. *Nat Genet* 41: 77-81.
51. Takeuchi F, Serizawa M, Yamamoto K, Fujisawa T, Nakashima E, *et al.* (2009) Confirmation of multiple risk Loci and genetic impacts by a genome-wide association study of type 2 diabetes in the Japanese population. *Diabetes* 58: 1690-1699.
52. Saxena R, Voight BF, Lyssenko V, Burt NP, de Bakker PI, *et al.* (2007) Genome-wide association analysis identifies loci for type 2 diabetes and triglyceride levels. *Science* 316: 1331-1336.
53. Scott LJ, Mohlke KL, Bonnycastle LL, Willer CJ, Li Y, *et al.* (2007) A genome-wide association study of type 2 diabetes in Finns detects multiple susceptibility variants. *Science* 316: 1341-1345.
54. Chambers JC, Zhang W, Zabaneh D, Sehmi J, Jain P, *et al.* (2009) Common genetic variation near melatonin receptor MTNR1B contributes to raised plasma glucose and increased risk of type 2 diabetes among Indian Asians and European Caucasians. *Diabetes* 58: 2703-2708.



55. Heid IM, Boes E, Muller M, Kollerits B, Lamina C, *et al.* (2008) Genome-wide association analysis of high-density lipoprotein cholesterol in the population-based KORA study sheds new light on intergenic regions. *Circ Cardiovasc Genet* 1: 10-20.
56. Bouatia-Naji N, Rocheleau G, Van Lommel L, Lemaire K, Schuit F, *et al.* (2008) A polymorphism within the G6PC2 gene is associated with fasting plasma glucose levels. *Science* 320: 1085-1088.
57. Liu XG, Tan LJ, Lei SF, Liu YJ, Shen H, *et al.* (2009) Genome-wide association and replication studies identified TRHR as an important gene for lean body mass. *Am J Hum Genet* 84: 418-423.
58. Yasuda K, Miyake K, Horikawa Y, Hara K, Osawa H, *et al.* (2008) Variants in KCNQ1 are associated with susceptibility to type 2 diabetes mellitus. *Nat Genet* 40: 1092-1097.
59. Unoki H, Takahashi A, Kawaguchi T, Hara K, Horikoshi M, *et al.* (2008) SNPs in KCNQ1 are associated with susceptibility to type 2 diabetes in East Asian and European populations. *Nat Genet* 40: 1098-1102.
60. Zhao J, Jin L, Xiong M (2006) Test for interaction between two unlinked loci. *Am J Hum Genet* 79: 831-845.
61. Cordell HJ (2009) Detecting gene-gene interactions that underlie human diseases. *Nat Rev Genet* 10: 392-404.
62. Kooperberg C and Ruczinski I (2005) Identifying interacting SNPs using Monte Carlo logic regression. *Genet Epidemiol* 28: 157-170.
63. Ruczinski I, Kooperberg C, LeBlanc M (2003) Logic regression. *J Comput Graph Stat* 12: 475-511.
